# Supplementary material for: Prevalence of depression symptoms and its influencing factors among pregnant women in late pregnancy in urban areas of Hengyang City, Hunan Province, China: a cross-sectional study
Source: PubMed Central journal article supplement — BMJ Open. 2020 Sep 1;10(9):e038511. doi: 10.1136/bmjopen-2020-038511 (PMC7467533; doi:10.1136/bmjopen-2020-038511), 2020-09-01
Supplement: bmjopen-2020-038511.draft_revisions.pdf [file bmjopen-2020-038511.draft_revisions.pdf]

# BMJ Open

BMJ Open is committed to open peer review. As part of this commitment we make the peer review history of every article we publish publicly available.

When an article is published we post the peer reviewers' comments and the authors' responses online. We also post the versions of the paper that were used during peer review. These are the versions that the peer review comments apply to.

The versions of the paper that follow are the versions that were submitted during the peer review process. They are not the versions of record or the final published versions. They should not be cited or distributed as the published version of this manuscript.

BMJ Open is an open access journal and the full, final, typeset and author-corrected version of record of the manuscript is available on our site with no access controls, subscription charges or pay-per-view fees (<http://bmjopen.bmj.com>).

If you have any questions on BMJ Open's open peer review process please email [info.bmjopen@bmj.com](mailto:info.bmjopen@bmj.com)

# BMJ Open

## Prevalence of depression symptoms and its influencing factors in late pregnancy in urban areas of Hengyang City, Hunan Province, China.

|                               |                                                                                                                                                                                                                                                                                                                                                                                                                                                                                                                                                                                                                                                                                                                                                                     |
|-------------------------------|---------------------------------------------------------------------------------------------------------------------------------------------------------------------------------------------------------------------------------------------------------------------------------------------------------------------------------------------------------------------------------------------------------------------------------------------------------------------------------------------------------------------------------------------------------------------------------------------------------------------------------------------------------------------------------------------------------------------------------------------------------------------|
| Journal:                      | <i>BMJ Open</i>                                                                                                                                                                                                                                                                                                                                                                                                                                                                                                                                                                                                                                                                                                                                                     |
| Manuscript ID                 | bmjopen-2020-038511                                                                                                                                                                                                                                                                                                                                                                                                                                                                                                                                                                                                                                                                                                                                                 |
| Article Type:                 | Original research                                                                                                                                                                                                                                                                                                                                                                                                                                                                                                                                                                                                                                                                                                                                                   |
| Date Submitted by the Author: | 16-Mar-2020                                                                                                                                                                                                                                                                                                                                                                                                                                                                                                                                                                                                                                                                                                                                                         |
| Complete List of Authors:     | Yu, Yunhan; Central South University Xiangya School of Public Health, Department of Social Medicine and Health Management<br>Zhu, Xidi; Central South University Xiangya School of Public Health, Department of Social Medicine and Health Management<br>Xu, Huilan; Central South University Xiangya School of Public Health, Social Medicine and Health Management<br>Hu, Zhao; Central South University Xiangya School of Public Health, Zhou, Wensu; Central South University, Social Medicine and Health Management, Xiangya School of Public Health;<br>Zheng, Baohua; Central South University Xiangya School of Public Health, Department of Social Medicine and Health Management<br>Yin, Shilin; Central South University Xiangya School of Public Health |
| Keywords:                     | MENTAL HEALTH, Depression & mood disorders < PSYCHIATRY, TROPICAL MEDICINE                                                                                                                                                                                                                                                                                                                                                                                                                                                                                                                                                                                                                                                                                          |
|                               |                                                                                                                                                                                                                                                                                                                                                                                                                                                                                                                                                                                                                                                                                                                                                                     |

SCHOLARONE™  
Manuscripts

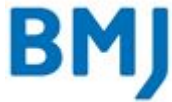

I, the Submitting Author has the right to grant and does grant on behalf of all authors of the Work (as defined in the below author licence), an exclusive licence and/or a non-exclusive licence for contributions from authors who are: i) UK Crown employees; ii) where BMJ has agreed a CC-BY licence shall apply, and/or iii) in accordance with the terms applicable for US Federal Government officers or employees acting as part of their official duties; on a worldwide, perpetual, irrevocable, royalty-free basis to BMJ Publishing Group Ltd ("BMJ") its licensees and where the relevant Journal is co-owned by BMJ to the co-owners of the Journal, to publish the Work in this journal and any other BMJ products and to exploit all rights, as set out in our [licence](#).

The Submitting Author accepts and understands that any supply made under these terms is made by BMJ to the Submitting Author unless you are acting as an employee on behalf of your employer or a postgraduate student of an affiliated institution which is paying any applicable article publishing charge ("APC") for Open Access articles. Where the Submitting Author wishes to make the Work available on an Open Access basis (and intends to pay the relevant APC), the terms of reuse of such Open Access shall be governed by a Creative Commons licence – details of these licences and which [Creative Commons](#) licence will apply to this Work are set out in our licence referred to above.

Other than as permitted in any relevant BMJ Author's Self Archiving Policies, I confirm this Work has not been accepted for publication elsewhere, is not being considered for publication elsewhere and does not duplicate material already published. I confirm all authors consent to publication of this Work and authorise the granting of this licence.

1  
2  
3 **Prevalence of depression symptoms and its influencing factors in late pregnancy in urban areas**  
4  
5 **of Hengyang City, Hunan Province, China.**  
6

7 Yun-Han Yu<sup>a, 1, ,</sup> Xi-Di Zhu<sup>a, 1,</sup> Hui-Lan Xu<sup>a,\*</sup>, Zhao Hu<sup>a</sup>, Wen-Su Zhou<sup>a</sup>, Bao-Hua Zheng, Shi-Lin  
8  
9 Yin<sup>a</sup>  
10  
11

12 a. Department of Social Medicine and Health Management , Xiangya School of Public Health, Central  
13  
14 South University, Changsha, China  
15

16  
17 \* Corresponding author. Tel.:+0731-84805459; Fax:+0731-84805459. Email addresses:  
18  
19 XHL202020@163.com (H.-L. Xu).  
20  
21

22 **Word count:** 3245 words.  
23

24 **Abstract**  
25

26 **Objectives:** To evaluate the prevalence of depressive symptoms and its influencing factors in Late  
27  
28 pregnancy.  
29

30 **Setting:** A cross-sectional survey was conducted on late pregnant women. Participants came from the  
31  
32 community in urban areas of Hengyang City.  
33

34 **Participants:** 819 pregnant women participated in the survey. Since 6 of them did not complete the  
35  
36 questionnaire survey, there were only 813 pregnant women in third trimester.  
37

38  
39 **Outcome measures:** Perinatal depression symptoms evaluated by using the Patient Health  
40  
41 Questionnaire-9 (PHA-9), and perinatal anxiety symptoms evaluated by using the Generalized Anxiety  
42  
43 Disorder Scale-7(GAD-7). Sociodemographic variables, obstetric characteristics, lifestyle behaviors,  
44  
45 family factors, social support, sleep quality, and self-efficacy were obtained through structured  
46  
47 questionnaires.  
48

49 **Results:** The prevalence of depression symptoms was 9.2% in late pregnancy. Age between 25 to 29  
50  
51 years (OR = 0.398, 95% CI 0.16,0.991), the relationship with her mother-in-law (OR=5.309, 95% CI  
52  
53 1.122,4.184), artificial insemination (OR=4.339, 95%CI 1.492,12.623), no exercise during pregnancy  
54  
55 (OR=2.666, 95%CI 1.177,6.039), low self-efficacy(OR=4.253, 95%CI 1.518,11.916), low social  
56  
57 support (OR=2.371, 95%CI 1.206,4.661),poor sleep quality (OR=2.134, 95%CI 1.131,4.027), existence  
58  
59  
60

of anxiety symptoms (OR=17.654, 95%CI 8.494,36.689) were associated with depression symptoms.

**Conclusion:** the study reported low rates of depression, and affected by life styles behaviors, family factors and psychosocial factors. To prevent mental disorders of pregnant women, early screening for mental disorders, promotion of healthy lifestyles, mental health care during pregnancy, and improved family and social support should be carried out during pregnancy nursing.

**Keywords:** Depression symptoms; Late pregnancy; Prevalence; Influencing factors; China

## Article Summary

### Strengths and limitations

#### Strengths:

1. This study investigated the mental health status of pregnant women after excluding pregnancy complications, and explored a wide range of influencing factors, including psychological, physiological and social aspects.

2. This study was a larger sample size than other studies in China, and the sample was from the community, avoided hospital bias.

#### Limitations:

1. The disadvantage of this study is that the cross-sectional study cannot determine the causal relationship between the influencing factors and depressive symptoms.

2. the participants' recall may lead to recall bias.

#### What this paper adds

the study reported lower rates of depression than other country. Biological, psychological and social factors all have different degrees of influence on depression symptoms. For the age as contradictory points, this paper reports that 25-29 years old is a protective factor for depression symptoms during pregnancy. As a special factor in the developing world, pregnant women who not that close to their mothers-in-law were more at risk for depression symptoms.

## 1. Introduction

1  
2  
3 Pregnancy women undergo role, physiological and psychological changes. Physiological problems  
4 may occur during pregnancy, such as constipation, sleepiness, physiological dyspnea, and hormone level  
5 fluctuation, while physiological discomfort, hormonal effects and changes in social roles may cause  
6 cognitive, behavioral and emotional changes in pregnant women, resulted in mental health problems.  
7 and is likely to continue to postpartum, lead to more serious psychological health and fetal adverse  
8 outcomes, developmental problems<sup>[1 2]</sup>. So it is of great significance to consider prenatal mental health  
9 status and determine its potential influencing factors.  
10  
11  
12  
13  
14  
15  
16

17  
18 Currently, there was a wide range of discussions on prenatal depression. However, the prevalence  
19 rates of these conditions were different in different countries based on their measurements and culture  
20 background variation. A meta-analysis of 74 studies of 41,480 women in 2016 reported that the  
21 incidence of combined antenatal depression symptoms was 8.4% (95% confidence interval (CI):  
22 7.2,9.6%)<sup>[3]</sup>. A study conducted between May 2017 and June 2018 at shalamar hospital found that the  
23 positive rate of depression symptoms was 40.89% based on the Goldberg depression scale among  
24 women seeking prenatal care in the third trimester of pregnancy<sup>[4]</sup>.  
25  
26  
27  
28  
29  
30  
31

32  
33 Associated factors for depression in pregnant women mainly included four domains: (1)socio-  
34 demographic factors; (2)pregnancy characteristics; (3) personality characteristics and (4)psychosocial  
35 factors. Sociodemographic factors such as age, for example, a study on depression symptoms of  
36 pregnant women in middle and third trimesters showed that the younger they are, the higher positive  
37 rate of depression symptoms they have<sup>[5]</sup>. pregnancy characteristics such as planned pregnancy<sup>[6]</sup> and  
38 history of abortion<sup>[7]</sup>. personality traits such as low self-efficacy, was related to prenatal depression<sup>[8]</sup>.  
39 psychosocial factors such as socioeconomic status, social support and life events were associated with  
40 mental health during pregnancy<sup>[9]</sup>.  
41  
42  
43  
44  
45  
46  
47  
48

49 Existing research on depression were more focused on postpartum, however,  
50 reports of depression symptoms in the late pregnancy were less common. Even though there were few  
51 studies have investigated the mental health status and its related factors among the third trimester  
52 pregnant women, most of them were explore that situation from single dimension, and minor specimen.  
53 Therefore, the purpose of current study was to describe the prevalence of depression symptoms in the  
54  
55  
56  
57  
58  
59  
60

1  
2  
3 third trimester of pregnancy, and to comprehensively analyzed its influencing factors. It may provide  
4 scientific basis for the evaluation of mental health status in pre-pregnancy examination program and  
5 mental health care service, so as to prevent the symptoms of depression in pregnant women.  
6  
7  
8  
9

## 10 11 **2. Methods**

### 12 *2.1. Design and participants*

13  
14  
15 This was a cross-sectional survey, using multi-stage cluster random sampling. There was 5  
16 administrative districts in Hunan province, and one street was randomly selected in each district. Then,  
17 14 communities were randomly selected according to a ratio of 1:3, including 4 communities of  
18 Zhengxiang street, 3 communities of Qingshan street, 3 communities of Baishazhou street, 2  
19 communities of Guangdong road street and 2 communities of Zhurong street. A total of 819 pregnant  
20 women in the third trimester of pregnancy were enrolled, who lived in urban areas of Hengyang for  
21 more than 6 months, signed informed consent. The study period was from July to September 2019,  
22 participants completed the survey by filling in a paper or electronic WeChat questionnaire after obtained  
23 informed consent. Pregnant women in labor and didn't complete the questionnaire, and with history of  
24 major organic diseases were excluded, the final study included 813 pregnant women, with an  
25 unresponsive rate of 0.7%. In fact, 819 pregnant women participated in the survey, but 6 of them did  
26 not complete the questionnaire survey. In fact, 813 pregnant women were analyzed, excluded missing  
27 values.  
28  
29  
30  
31  
32  
33  
34  
35  
36  
37  
38  
39  
40  
41  
42  
43  
44

### 45 *2.2 Measurement*

46  
47 The self-report questionnaire was used to obtain demographic information of pregnant women,  
48 including age, nationality, marital status, education and their husband, occupation and their husband,  
49 medical expenses payment methods.  
50  
51

52  
53 Pregnancy characteristics included parity (0,1,≥2), method of pregnancy (Artificial  
54 insemination/Spontaneous pregnancy), whether planned pregnancy, pregnancy complications  
55 (Including gestational hypertension, gestational diabetes, intrahepatic cholestasis, cervical disease),  
56  
57  
58  
59  
60

1  
2  
3 number of abortions (0,1,≥2), whether regular antenatal examination.  
4

5 Lifestyle included BMI , smoking, drinking, exercise. BMI was based on the pregnant woman's  
6 self-reported height and weight before and after pregnancy , the China's classification of Thin  
7 (BMI<18.5 kg/m<sup>2</sup>), normal weight (BMI of 18.5-23.9 kg/m<sup>2</sup>), overweight (BMI >23.9 kg/m<sup>2</sup>). Smoking  
8 was defined as an average of one cigarette a day for the past year. Drinking was defined as drinking  
9 alcohol on average once a week. Exercise was defined as walking, yoga, etc. during the past week, Yes  
10 or No.  
11

12 Depression symptoms in the third trimester of pregnancy were assessed using the Patient Health  
13 Questionnaire (PHQ-9). It has been widely used in clinical and observation studies with good reliability  
14 and validity. There are 9 items in this questionnaire, and the score of each item is set to 0-3, with a total  
15 score of 27. The higher the score, the more obvious the depression symptoms are, the total score ≥10 is  
16 considered to be Depression symptoms<sup>[10 11]</sup>, with a Cronbach's  $\alpha$  coefficient of 0.773. Generalized  
17 Anxiety Disorder scale-7 (GAD-7) was used in this study to evaluate the Anxiety of the elderly in  
18 institutions. This table was developed by Spitzer et al. 2006 and consisted of 7 items for screening  
19 generalized anxiety disorder<sup>[12]</sup>. Participants were asked if they had experienced seven symptoms in the  
20 past two weeks, each item being scored on a scale of four, "0= not at all", "1= days", "2= more than half  
21 days", and "3= almost every day", with a score ranging from 0 to 21. Studies have shown that using a  
22 cut-off score of 10 is a good way to distinguish anxiety from non-anxiety<sup>[13]</sup>. In our study, the Cronbach's  
23  $\alpha$  coefficient was 0.773.  
24

25 Family factors include Per-capita monthly income, family function, the relationship with mother-in-  
26 law and experience of domestic abuse. Family function was assessed using the Family Adaptation  
27 Partnership Growth and Resolve Index (APGAR). APGAR scale contains five items and five  
28 dimensions, respectively reflecting the adaptability, cooperation, maturity, affection and affinity of  
29 family functions. Each item was scored using a 3-point likert scale, with a total score of 0-10, with a  
30 score of 7-10 indicating good family function, 4-6 indicating moderate family function disorder, and 0-3  
31 indicating severe family function disorder<sup>[14]</sup>. APGAR is widely used and has good reliability and  
32



1  
2  
3 validity in pregnant women in China<sup>[15]</sup>, with a Cronbach's  $\alpha$  coefficient of 0.876 in this study. The  
4 Abuse Assessment Screen (AAS) was used to assess domestic violence during pregnancy. Eight items  
5 were used to assess exposure to domestic violence in the past year and during pregnancy, including  
6 physical, emotional and sexual violence. The respondents answered 'yes' to item 3/4/5/6/7, the total  
7 number of times of abuse was more than three times, subjective pain, and the three conditions were  
8 considered to have experienced domestic violence<sup>[16]</sup>. Research shows that AAS questionnaire has good  
9 reliability and validity in pregnant women, with a Cronbach's  $\alpha$  coefficient of 0.685 in this study.  
10  
11  
12  
13  
14  
15  
16

17  
18 Social Support Rating Scale (SSRS) <sup>[17]</sup> was used in this study to evaluate the status of Social Support  
19 for pregnant women, which introduced by Xiao and included objective support, subjective support and  
20 the availability of support. The higher score means higher social support. The total score less than 39 in  
21 this study was considered as low social support. The scale has a good reliability and validity, with a  
22 Cronbach's  $\alpha$  coefficient of 0.705 in this study.  
23  
24  
25  
26  
27

28  
29 This study used the Pittsburgh sleep quality index (PSQI) to evaluate maternal sleep quality. The total  
30 score of PSQI is between 0 and 21 points, and the higher the score, the worse the sleep quality. PSQI  
31 score  $\leq 7$  was rated as "good sleep quality", while PSQI score  $> 7$  was rated as "poor sleep quality".  
32 Studies have shown that PSQI scale has good reliability and validity in evaluating sleep quality <sup>[18]</sup>, and  
33 the Chinese version of the PSQI questionnaire has been widely accepted as a sleep quality assessment  
34 method in mainland China, with a Cronbach's  $\alpha$  coefficient of 0.789 in this study .  
35  
36  
37  
38  
39

40  
41 Self-efficacy Scale (GSES) was used to evaluate pregnant women's self-efficacy. GSES was  
42 developed by German health psychology and clinical experts Ralf and Schwarzer, and translated into  
43 Chinese by JianXin Zhang <sup>[19]</sup>. This scale is a single-dimension scale with 10 items. Each item has 4  
44 options: totally incorrect, moderately correct, mostly correct and completely correct, and they are  
45 marked as 1, 2, 3 and 4, with the total score ranging from 10 to 40. The total score is divided by the total  
46 score of 10 items into low level (0-2), medium level (2.1-3), and high level (3.1-4). The higher the score,  
47 the better the self-efficacy is. The Cronbach '  $\alpha$  coefficient of this scale was 0.898 in this study.  
48  
49  
50  
51  
52  
53  
54

### 55 2.3 Ethical considerations

56  
57 The study was approved by the Ethics Committee of the Xiangya school of public Health prior to the  
58  
59  
60

1  
2  
3 field investigation, and all respondents volunteered for the survey.  
4  
5  
6

#### 7 *2.4 Statistical analysis*

9 SPSS version 25.0 was used to collate and analyze the data, Continuous variables were converted  
10 into categorical variables by referring to literatures and combining research purposes, and expressed as  
11 n%. Chi-square test and Fisher's test were used for univariate analysis to compare the characteristics of  
12 depression and non-depression. Variables with  $P < 0.05$  in univariate analysis were included in  
13 multivariate binary logistic regression.  
14  
15  
16  
17  
18

#### 19 *2.5 Patient and public involvement*

20 Patients and the public were not involved in the design of this study.  
21  
22  
23

### 24 **3. Results**

#### 25 *3.1 sample characteristic*

26 All participants aged 17-54 years (mean=29), 67.1% of pregnant women Pre-BMI was normal, most  
27 in the state of marriage (95.4%), more than half of the highest educational for college/university and  
28 above(58.1%), 70% of households per-capita monthly income was between 3001-7999, the vast  
29 majority (95.9%) of pregnant women was conceived naturally, more than half (59%) was in a planned  
30 pregnancy, 41.6% was pregnant for the first time, more than half (64.0%) of pregnant women was no  
31 history of miscarriage, 91.4% of participants exercised during pregnancy. 75.4% of the pregnant women  
32 had good sleep quality, 60.9% of the self-efficacy was in the medium level, 16.5% was in the high level,  
33 60.4% of the pregnant women had good family function, most of the pregnant women (90.5%) did not  
34 experience violence during pregnancy, more than half (64.3%) of the pregnant women had a good  
35 relationship with their mother-in-law, more than half (54.9%) of the pregnant women's social support  
36 rating scale score  $\geq 39$ . In our study, the prevalence of depression symptoms and anxiety symptoms was  
37 9.2% and 7.9%, respectively. The results were shown in Table 1.  
38  
39  
40  
41  
42  
43  
44  
45  
46  
47  
48  
49  
50  
51  
52  
53  
54  
55  
56  
57  
58  
59  
60

Table 1

Characteristic of samples and Distribution of emotional problems(N=813).

| Characteristic                                    | Total      | No Depression | Depression | <i>p</i> Value     |
|---------------------------------------------------|------------|---------------|------------|--------------------|
|                                                   | n(%)       | n(%)          | n(%)       |                    |
| N                                                 | 813(100.0) | 738(90.8)     | 75(9.2)    |                    |
| Age                                               |            |               |            | <b>0.017</b>       |
| ≤24                                               | 115(14.1)  | 100(87.0)     | 15(13.0)   |                    |
| 25-29                                             | 366(45.1)  | 343(93.7)     | 23(6.3)    |                    |
| 30-34                                             | 232(28.5)  | 202(87.1)     | 30(12.9)   |                    |
| ≥35                                               | 100(12.3)  | 93(93.0)      | 7(7.0)     |                    |
| Pre-pregnant BMI                                  |            |               |            | <b>0.002</b>       |
| Thin (BMI<18.5 kg/m <sup>2</sup> )                | 165(20.4)  | 158(95.8)     | 7(4.2)     |                    |
| Normal (BMI of 18.5-23.9 kg/m <sup>2</sup> )      | 542(67.1)  | 479(88.4)     | 63(11.6)   |                    |
| Overweight/obesity (BMI >23.9 kg/m <sup>2</sup> ) | 101(12.5)  | 97(96.0)      | 4(4.0)     |                    |
| Marital Status                                    |            |               |            | 0.527 <sup>a</sup> |
| Single/divorced/widowed                           | 37(4.6 )   | 32(86.5)      | 5(13.5)    |                    |
| Married                                           | 776(95.4)  | 706(91.0)     | 70(9.0)    |                    |
| Working Status                                    |            |               |            | 0.838              |
| Unemployment                                      | 214(26.3)  | 195(91.1)     | 19(8.9)    |                    |
| Employment                                        | 599(73.7)  | 543(90.7)     | 56(9.3)    |                    |
| Education level                                   |            |               |            | 0.577              |
| Junior middle school or below                     | 158(19.4)  | 140(88.6)     | 18(11.4)   |                    |
| High school or technical secondary school         | 183(22.5)  | 167(91.3)     | 16(8.7)    |                    |
| College or above                                  | 472(58.1)  | 431(91.3)     | 41(8.7)    |                    |
| Per-capita monthly income, ¥                      |            |               |            | 0.603              |

|    |                                 |            |           |                          |
|----|---------------------------------|------------|-----------|--------------------------|
| 1  |                                 |            |           |                          |
| 2  |                                 |            |           |                          |
| 3  | ≤3000                           | 73(9.0 )   | 64(87.7)  | 9(12.3)                  |
| 4  |                                 |            |           |                          |
| 5  |                                 |            |           |                          |
| 6  | 3001-7999                       | 572(70.3)  | 520(90.9) | 52(9.1)                  |
| 7  |                                 |            |           |                          |
| 8  | ≥8000                           | 168(20.7)  | 154(91.7) | 14(8.3)                  |
| 9  |                                 |            |           |                          |
| 10 | Relationship with mother-in-law |            |           | <b>0.000</b>             |
| 11 |                                 |            |           |                          |
| 12 | Poor                            | 27(3.3)    | 22(81.5)  | 5(18.5)                  |
| 13 |                                 |            |           |                          |
| 14 | Moderate                        | 263(32.3 ) | 226(85.9) | 37(14.1)                 |
| 15 |                                 |            |           |                          |
| 16 |                                 |            |           |                          |
| 17 | Good                            | 523(64.3)  | 490(93.7) | 33(6.3)                  |
| 18 |                                 |            |           |                          |
| 19 |                                 |            |           |                          |
| 20 | Method of pregnancy             |            |           | <b>0.034<sup>a</sup></b> |
| 21 |                                 |            |           |                          |
| 22 | Artificial insemination         | 33(4.1)    | 26(78.8)  | 7(21.2)                  |
| 23 |                                 |            |           |                          |
| 24 | Spontaneous pregnancy           | 780(95.9)  | 712(91.3) | 68(8.7)                  |
| 25 |                                 |            |           |                          |
| 26 | Planned Pregnancy               |            |           | 0.291                    |
| 27 |                                 |            |           |                          |
| 28 | No                              | 333(41.0)  | 298(89.5) | 35(10.5)                 |
| 29 |                                 |            |           |                          |
| 30 | Yes                             | 480(59.0)  | 440(91.7) | 40(8.3)                  |
| 31 |                                 |            |           |                          |
| 32 | Parity                          |            |           | 0.201                    |
| 33 |                                 |            |           |                          |
| 34 | 0                               | 338(41.6)  | 314(92.9) | 24(7.1)                  |
| 35 |                                 |            |           |                          |
| 36 | 1                               | 413(50.8)  | 368(89.1) | 45(10.9)                 |
| 37 |                                 |            |           |                          |
| 38 | ≥2                              | 62(7.6)    | 56(90.3)  | 6(9.7)                   |
| 39 |                                 |            |           |                          |
| 40 | Number of Abortions             |            |           | 0.112                    |
| 41 |                                 |            |           |                          |
| 42 | 0                               | 520(64.0)  | 480(92.3) | 40(7.7)                  |
| 43 |                                 |            |           |                          |
| 44 | 1                               | 114(14.0)  | 99(86.8)  | 15(13.2)                 |
| 45 |                                 |            |           |                          |
| 46 | ≥2                              | 179(22.0)  | 159(88.8) | 20(11.2)                 |
| 47 |                                 |            |           |                          |
| 48 | Exercise                        |            |           | <b>0.001</b>             |
| 49 |                                 |            |           |                          |
| 50 | No                              | 70(8.6)    | 56(50)    | 14(20.0)                 |
| 51 |                                 |            |           |                          |
| 52 | Yes                             | 743(91.4)  | 682(91.8) | 61(8.2)                  |
| 53 |                                 |            |           |                          |
| 54 | PSQI                            |            |           | <b>0.000</b>             |
| 55 |                                 |            |           |                          |
| 56 | Bad                             | 200(24.6)  | 163(81.5) | 37(18.5)                 |
| 57 |                                 |            |           |                          |
| 58 |                                 |            |           |                          |
| 59 |                                 |            |           |                          |
| 60 |                                 |            |           |                          |

|    |                     |           |           |              |
|----|---------------------|-----------|-----------|--------------|
| 1  |                     |           |           |              |
| 2  |                     |           |           |              |
| 3  | Good                | 613(75.4) | 575(93.8) | 38(6.2)      |
| 4  |                     |           |           |              |
| 5  | PAGAR               |           |           | <b>0.000</b> |
| 6  |                     |           |           |              |
| 7  | Serious Difficulty  | 66(8.1)   | 49(74.2)  | 17(25.8)     |
| 8  |                     |           |           |              |
| 9  | Moderate Difficulty | 256(31.5) | 234(91.4) | 22(8.6)      |
| 10 |                     |           |           |              |
| 11 | Well                | 491(60.4) | 455(92.7) | 36(7.3)      |
| 12 |                     |           |           |              |
| 13 | GSES                |           |           | <b>0.000</b> |
| 14 |                     |           |           |              |
| 15 | Low Level           | 184(22.6) | 151(82.1) | 33(17.9)     |
| 16 |                     |           |           |              |
| 17 | Medium Level        | 495(60.9) | 461(93.1) | 34(6.9)      |
| 18 |                     |           |           |              |
| 19 |                     |           |           |              |
| 20 |                     |           |           |              |
| 21 | High Level          | 134(16.5) | 126(94.0) | 8(6.0)       |
| 22 |                     |           |           |              |
| 23 | Domestic violence   |           |           | 0.107        |
| 24 |                     |           |           |              |
| 25 | Yes                 | 77(9.5)   | 66(85.7)  | 11(14.3)     |
| 26 |                     |           |           |              |
| 27 | No                  | 736(90.5) | 672(91.3) | 64(8.7)      |
| 28 |                     |           |           |              |
| 29 |                     |           |           |              |
| 30 | SSRS                |           |           | <b>0.000</b> |
| 31 |                     |           |           |              |
| 32 | < 39                | 367(45.1) | 313(85.3) | 54(14.7)     |
| 33 |                     |           |           |              |
| 34 |                     |           |           |              |
| 35 | ≥39                 | 446(54.9) | 425(95.3) | 21(4.7)      |
| 36 |                     |           |           |              |
| 37 | Anxiety             |           |           | <b>0.000</b> |
| 38 |                     |           |           |              |
| 39 | Yes                 | 64(7.9)   | 30(46.9)  | 34(53.1)     |
| 40 |                     |           |           |              |
| 41 | No                  | 749(92.1) | 708(94.5) | 41(5.5)      |
| 42 |                     |           |           |              |
| 43 |                     |           |           |              |
| 44 |                     |           |           |              |

\* Continuity Correction.

For ease of reading, only the variables included in the binary logistic analysis was shown ( $P < 0.05$ ).

Abbreviations: PSQI, Pittsburgh sleep quality index; APGAR, Family Adaptation Partnership Growth and Resolve Index; GSES, Self-efficacy Scale; SSRS, Social Support Rating Scale.

### 3.2 The influencing factors of depressive symptoms in late pregnancy.

The results of Chi-square test showed that age, pre-pregnancy BMI, relationship with mother-in-law, mode of conception, exercise during pregnancy, sleep quality, self-efficacy, social support and anxiety were significantly correlated with depression symptoms in late pregnancy (all  $P < 0.05$ ). The results were shown in Table 1.

Multivariate binary logistic regression results show that women age between 25 to 29 years (OR = 0.398, 95% CI 0.16,0.991), with poor relationships with their mother-in-law (OR=5.309, 95% CI 1.122,4.184), artificial insemination during pregnancy (OR = 4.339, 95%CI 1.492,12.623), no exercise during pregnancy (OR=2.666, 95%CI 1.177,6.039), low self-efficacy(OR=4.253, 95%CI 1.518,11.916), low social support (OR=2.371, 95%CI 1.206,4.661), poor sleep quality (OR=2.134, 95%CI 1.131,4.027) and anxiety symptoms (OR=17.654, 95%CI 8.494,36.689) were associated with depression symptoms during pregnancy. The results were shown in Table 2.

Table 2.

Factors associated with depression symptoms in late pregnancy(N=813).

| Variables                              | $\beta$       | Wald         | <i>p</i> Value | OR (95%CI)                 |
|----------------------------------------|---------------|--------------|----------------|----------------------------|
| <b>Age</b>                             |               |              |                |                            |
| $\leq 24$                              |               |              |                | Reference                  |
| 25-29                                  | <b>-0.921</b> | <b>3.919</b> | <b>0.048</b>   | <b>0.398(0.160–0.991)</b>  |
| 30-34                                  | 0.544         | 1.343        | 0.247          | 1.723(0.686–4.326)         |
| $\geq 35$                              | -0.053        | 0.007        | 0.932          | 0.949(0.284–3.171)         |
| <b>Relationship with mother-in-law</b> |               |              |                |                            |
| Poor                                   | -0.890        | 1.334        | 0.248          | 0.411(0.091–1.859)         |
| Moderate                               | <b>0.773</b>  | <b>5.309</b> | <b>0.021</b>   | <b>2.167(1.122–4.184)</b>  |
| Good                                   |               |              |                | Reference                  |
| <b>Method of conception</b>            |               |              |                |                            |
| Artificial insemination                | <b>1.468</b>  | <b>7.257</b> | <b>0.007</b>   | <b>4.339(1.492–12.623)</b> |
| Spontaneous pregnancy                  |               |              |                | Reference                  |

|              |              |               |              |                             |
|--------------|--------------|---------------|--------------|-----------------------------|
| Exercise     |              |               |              |                             |
| No           | <b>0.980</b> | <b>5.522</b>  | <b>0.019</b> | <b>2.666 (1.177–6.039)</b>  |
| Yes          |              |               |              | Reference                   |
| PSQI         |              |               |              |                             |
| Bad          | <b>0.758</b> | <b>5.476</b>  | <b>0.019</b> | <b>2.134(1.131–4.027)</b>   |
| Good         |              |               |              | Reference                   |
| GSES         |              |               |              |                             |
| Low Level    | <b>1.448</b> | <b>7.582</b>  | <b>0.006</b> | <b>4.253(1.518–11.916)</b>  |
| Medium Level | 0.408        | 0.674         | 0.412        | 1.504(0.568–3.985)          |
| High Level   |              |               |              | Reference                   |
| SSRS         |              |               |              |                             |
| < 39         | <b>0.863</b> | <b>6.271</b>  | <b>0.012</b> | <b>2.371(1.206–4.661)</b>   |
| ≥39          |              |               |              | Reference                   |
| Anxiety      |              |               |              |                             |
| No           |              |               |              | Reference                   |
| Yes          | <b>2.871</b> | <b>59.166</b> | <b>0.000</b> | <b>17.654(8.494–36.689)</b> |

## 4. Discussion

### 4.1 The prevalence of depression symptoms

The positive rate of depression symptoms in the third trimester was 9.2%, lower rates of depression symptoms than any other country in the world. The positive rate of depression symptoms (18%) reported in Pakistan<sup>[20]</sup>, and the positive rate of depression symptoms (46.8%) reported in Thailand<sup>[21]</sup>. The main reasons for this result are cultural and demographic differences between countries, as well as the adaptability of different scales<sup>[22]</sup>. Under the influence of China's "Saving face culture", pregnant women tend to hide their negative emotions in order not to be seen as weak or discriminated against, which leads researchers to underestimate the positive rate of depression and anxiety symptoms in this group,

1  
2  
3 making our results different from those of other countries.  
4  
5  
6

#### 7 *4.2 The influencing factors of depression symptoms in late pregnancy.*

9 Pregnant women between the ages of 25 and 29 had a lower risk of depression than younger group,  
10 this was in contrast to a meta-analysis in Ethiopia that reported that pregnant women between 20 and 29  
11 were more likely to have symptoms of prenatal depression<sup>[23]</sup> , probably because of differences in  
12 cultural and educational levels between the two countries. Most pregnant women in this age group  
13 already had work experience, so they were less worried about finding a job after becoming pregnant. In  
14 china, the legal age for marriage and childbirth was 20, so they were more likely to experience having  
15 children and had more knowledge and skills about pregnancy and childbirth<sup>[24]</sup>. In addition, women aged  
16 25 to 29 have higher levels of psychological and physical maturity and are better able to withstand  
17 stressful life events and prevent depression symptoms.  
18  
19  
20  
21  
22  
23  
24  
25  
26  
27  
28

29 As a special culture of developing countries, the relationship culture between mother-in-law and  
30 daughter-in-law has been discussed in other articles, and the results were similar to ours <sup>[25 26]</sup>. In our  
31 study, pregnant women with moderate relationships were more than twice as likely to have symptoms  
32 of prenatal depression as women with good relationships. In Chinese culture, people were not easy to  
33 report or admit that they had relationship friction or poor relationship with others. Most people were  
34 used to using moderate relationship as a substitute, which led to greater risks for pregnant women who  
35 have moderate relationship with their mothers-in-law. Due to the one-child policy implemented in China  
36 in the 1980s, the relationship between parents and children was an important part of the family  
37 relationship, and coupled with the influence of family culture and intergenerational transfer, it was  
38 common for women to live with their in-laws after marriage in less developed areas<sup>[27]</sup>. Due to the  
39 differences in age, culture, education and living habits, the two were prone to conflict, but since there  
40 was no blood ties, and living together for a long time. The friction between mother-in-law and daughter-  
41 in-law, coupled with the pregnant s concern about the conflict, was likely to continue to affect the  
42 pregnant woman's mood and produce depression symptoms<sup>[26 28]</sup>.  
43  
44  
45  
46  
47  
48  
49  
50  
51  
52  
53  
54  
55  
56  
57  
58

59 Artificial insemination was a risk factor for depression symptoms and has a significant impact on the  
60



1  
2  
3 mental health of pregnant women. The main reason for artificial insemination was infertility, and women  
4 were more likely to feel the stress of infertility<sup>[29]</sup>. Because of China's outdated culture of "having a boy  
5 to carry on the family line", so artificial insemination, as a manifestation of fertility pressure, continued  
6 to affect the mental health of pregnant women<sup>[30]</sup>. After successful artificial insemination, the state of  
7 pregnancy became the focus of attention of oneself and the family, worried about the fatal, which made  
8 the pregnant woman of artificial insemination have more worry and excessive tension than the pregnant  
9 woman of natural pregnancy<sup>[31]</sup>.

10  
11  
12  
13  
14  
15  
16  
17  
18 Women who did not exercise during pregnancy might be at greater risk for depression, and exercised  
19 during pregnancy could be effective in preventing depression symptoms. Exercise had positive cognitive  
20 and emotional benefits while reduced pain and negative effects<sup>[32]</sup>.

21  
22  
23  
24  
25  
26  
27  
28  
29  
30  
31  
32  
33  
34 Perinatal depression symptoms were associated with low self-efficacy in pregnant women, which was  
35 related to the mediating effect of self-efficacy on social support, pregnancy stress and depression  
36 symptoms<sup>[33]</sup>. Pregnant women with high levels of self-efficacy could actively face of stressful events  
37 in life, was more advantageous to enhance self-efficacy, thus effectively regulate mood, the prevention  
38 of depression symptoms.

39  
40  
41  
42  
43  
44  
45  
46  
47  
48  
49  
50  
51  
52  
53  
54  
55  
56  
57  
58  
59  
60 Consistent with other findings, poor sleep quality was associated with depression symptoms in late  
pregnancy of pregnancy<sup>[34]</sup>. Due to the night urine, fetal movement, leg cramps and other symptoms, the  
number and time of the pregnant women waked up at night would increase, the sleep time shortened,  
resulted in poor sleep quality, depression symptoms was related to sleep disorders in the late pregnancy  
<sup>[35]</sup>.

Lack of social support were risk factors of depression symptoms, pregnant woman could direct  
effects on depression of pregnant women <sup>[36 37]</sup>. As an important social resource for pregnant women,  
social support function was the social determinant of mental health. Positive social support made people  
feel concerned, loved and valued, which could improve the quality of life of pregnant women and  
promote their mental health<sup>[38 39]</sup>.

Consistent with the results of previous studies, pregnant women with anxiety during pregnancy  
were more likely to suffer from depression symptoms<sup>[9 40]</sup>. Depression and anxiety symptoms have

1  
2  
3 similarities, so they were often found to coexist [41]. In addition, different emotional problems would  
4 affect each other, increased the risk of other emotions[9].  
5  
6

## 7 **5. Limitation**

8  
9 The limitations of this study was that cross-sectional data were used to determine the causal  
10 relationship between risk factors and depressive, and there were options in the questionnaire that needed  
11 to be filled by participants recalled the situation of the last week, month or year, so there was recall bias.  
12  
13 However, this questionnaire selected a measurement tool with certain reliability and validity to minimize  
14 this problem. One more, the data were from women in the late pregnancy of urban pregnancy in  
15 Hengyang city, which couldn't be extended to rural areas. However, due to the urbanization process and  
16 intergenerational transfer process in China, this study had greater predictive significance. In addition ,  
17  
18 After screening pregnant women with depression symptoms, no further diagnosis and intervention was  
19 performed.  
20  
21  
22  
23  
24  
25  
26  
27  
28

## 29 **6. Conclusion**

30  
31 Our study reported that the prevalence rate of depression symptoms was 9.2% in pregnant women in  
32 Hengyang city. The influencing factors were age, relationship with the mother-in-law, mode of  
33 pregnancy, exercise during pregnancy, sleep quality, self-efficacy, social support, and symptoms of  
34 anxiety symptoms. This suggested that the medical institutions should add mental health screening tools  
35 in pregnancy examination to realize early discovery, early diagnosis and early treatment; When  
36 implementing maternal health care in medical institutions and community health service institutions, we  
37 should pay attention to the psychological status of pregnant women, provide them with targeted maternal  
38 health nursing.  
39  
40  
41  
42  
43  
44  
45  
46  
47  
48  
49

## 50 **Acknowledgments**

51  
52 The author would like to thank all members of the research team for their hard work in the process of  
53 research design, data collection, and the academic guidance and assistance of team members in the  
54 process of paper writing.  
55  
56  
57  
58  
59  
60

**Funding**

None

**Disclaimer**

The views expressed in this article belong to the authors and are not to the official position of any other institution or funder.

**Ethical Statement**

The study has been approved by the Ethics Committee of the Xiangya school of Public Health, Central South University on 15, July, 2019 (XYGW-2019-056).

**Conflict of interest**

None

**Author Contributions**

Yunhan yu, Xidi zhu, Zhao hu: Conceptualization, Methodology, Software; Yunhan Yu: Data curation, Writing, Original draft preparation, Reviewing; Yunhan yu, Xidi zhu, Zhao hu, Wensu zhou, Baohua zheng, Shilin yin: Visualization, Investigation; Huilan xu: Supervision.

## References

1. Walder DJ, Laplante DP, Sousa-Pires A, et al. Prenatal maternal stress predicts autism traits in 6 year-old children: Project Ice Storm. *Psychiatry Research* 2014;219:353-60.
2. Staneva A, Bogossian F, Pritchard M, et al. The effects of maternal depression, anxiety, and perceived stress during pregnancy on preterm birth: A systematic review. *Women & Birth* 2015:S187151921500030X.
3. Cameron EE, Sedov ID, Tomfohr-Madsen LM. Prevalence of Paternal Depression in Pregnancy and the Postpartum: An Updated Meta-Analysis. *Journal of Affective Disorders* 2016;206:189-203.
4. Sabir M, Nagi MLF, Kazmi TH. Prevalence of antenatal depression among women receiving antenatal care during last trimester of pregnancy in a tertiary care private institute of Lahore. *Pakistan journal of medical sciences* 2019;35:527-31.
5. Bowen A, Bowen R, Maslany G, et al. Anxiety in a socially high-risk sample of pregnant women in Canada. *Canadian Journal of Psychiatry* 2008;53:435.
6. Mohammad KI, Gamble JA, Creedy DK. Prevalence and factors associated with the development of antenatal and postnatal depression among Jordanian women. 2011;27:e238-e45.
7. Scheidt CE, Kunze M, Wangler J, et al. [Psychological consequences of perinatal loss in subsequent pregnancies--a comparative study]. *Psychother Psychosom Med Psychol* 2008;58:475-78.
8. Kossakowska, Karolina. Incidence and determinants of postpartum depression among healthy pregnant women and high-risk pregnant women. *Postępy Psychiatrii i Neurologii* 2016;25:1-21.
9. Tang X, Lu Z, Hu D, et al. Influencing factors for prenatal Stress, anxiety and depression in early pregnancy among women in Chongqing, China. *J Affect Disord* 2019;253:292-302.
10. Kroenke K, Spitzer RL, Williams JBW. The PHQ-9 : Validity of a Brief Depression Severity Measure. *Journal of General Internal Medicine* 2001;16:606-13.
11. Chin W-Y, Wan EYF, Dowrick C, et al. Tree analysis modeling of the associations between PHQ-9 depressive symptoms and doctor diagnosis of depression in primary care. *Psychological Medicine* 2019;49:449-57.
12. Spitzer RL, Kroenke K, Williams JBW, et al. A Brief Measure for Assessing Generalized Anxiety Disorder: The GAD-7. *Archives of Internal Medicine* 2006;166:1092-97.
13. Schalet BD, Cook KF, Choi SW, et al. Establishing a common metric for self-reported anxiety: Linking the MASQ, PANAS, and GAD-7 to PROMIS Anxiety. *J Anxiety Disord* 2014;28:88-96.
14. Smilkstein G, Ashworth C, Dan M. Validity and Reliability of the Family APGAR as a Test of Family Function. *J Fam Pract* 1982;15:303-11.
15. Liu Y, Xiu-ling D, Li Z. Influence of social support and family function on the approach of delivery. *Chinese modern clinical medicine* 2012;38:358-61.
16. Reichenheim, E M. Comparison between the abuse assessment screen and the revised

- 1  
2  
3  
4 conflict tactics scales for measuring physical violence during pregnancy. *Journal of*  
5 *Epidemiology & Community Health* 2004;58:523-27.
- 6 17. Xiao SY. The social support rating scale. *Chin Ment Health J* 1999;12:127-31.
- 7  
8 18. Liu, Tang M. Reliability and validity of the Pittsburgh sleep quality index *Chinese Journal of*  
9 *Psychiatry* 1996;29:103-07.
- 10  
11 19. Zhang JX, Schwarzer R. Measuring optimistic self-beliefs: A Chinese adaptation of the  
12 *General Self-Efficacy Scale*. *Psychologia An International Journal of Psychology in the Orient*  
13 1995;38:174-81.
- 14  
15 20. Karmaliani R, Asad N, Bann CM, et al. Prevalence of anxiety, depression and associated  
16 factors among pregnant women of Hyderabad, Pakistan. *The International journal of social*  
17 *psychiatry* 2009;55:414-24.
- 18  
19 21. Nitikorn P, Leif E, C. LP. Antenatal depressive symptoms during late pregnancy among  
20 women in a North-eastern province of Thailand: prevalence and associated factors. *Asian*  
21 *Journal of Psychiatry* 2018;36:102-07.
- 22  
23 22. Halbreich U, Karkun S. Cross-cultural and social diversity of prevalence of postpartum  
24 depression and depressive symptoms. *Journal of Affective Disorders* 2016;91:97-111.
- 25  
26 23. Ayano G, Tesfaw G, Shumet S. Prevalence and determinants of antenatal depression in  
27 Ethiopia: A systematic review and meta-analysis. *PloS one* 2019;14:e0211764.
- 28  
29 24. Qiao Y-X, Wang J, Li J, et al. The prevalence and related risk factors of anxiety and  
30 depression symptoms among Chinese pregnant women in Shanghai. *Australian & New Zealand*  
31 *Journal Of Obstetrics & Gynaecology* 2009;49:185-90.
- 32  
33 25. Fisher J, Tran T, La Bt, et al. Common perinatal mental disorders in northern Viet Nam:  
34 community prevalence and health care use. *Bulletin of the World Health Organization*  
35 2010;88:737-45.
- 36  
37 26. Wan EY, Moyer CA, Harlow SD, et al. Postpartum depression and traditional postpartum  
38 care in China: Role of Zuoyuezi. *Int J Gynecol Obstet* 2009;104:209-13.
- 39  
40 27. Jiang QB, Liu YX. Low fertility and concurrent birth control policy in China. *Hist Fam*  
41 2016;21:551-77.
- 42  
43 28. Fisher J, de Mello MC, Patel V, et al. Prevalence and determinants of common perinatal  
44 mental disorders in women in low- and lower-middle-income countries: a systematic review.  
45 *Bulletin Of the World Health Organization* 2012;90:139-49.
- 46  
47 29. Hosaka T, Matsubayashi H, Sugiyama Y, et al. Effect of psychiatric group intervention on  
48 natural-killer cell activity and pregnancy rate. *Gen Hosp Psych* 2002;24:353-56.
- 49  
50 30. H m, Ren J, Gao P. A related study of depression and anxiety in female patients with  
51 infertility. *Chinese psychiatry* 2017;30:438-40.
- 52  
53 31. Ren LJ, Zhang Y, Xu Q. Analysis of anxiety and depression in pregnant women at different  
54 stages of pregnancy and its influencing factors. *Chinese people's military surgeon* 2018;61:797-  
55 801.
- 56  
57 32. Lindwall M, Josefsson T, Archer T. Effects of Physical Exercise on Depressive Symptoms  
58  
59  
60

- 1  
2  
3 and Biomarkers in Depression. *Cns Neurol Disord Drug Targets* 2014;13:-.
- 4  
5 33. Razurel C, Kaiser B, Antonietti JP, et al. Relationship between perceived perinatal stress  
6 and depressive symptoms, anxiety, and parental self-efficacy in primiparous mothers and the  
7 role of social support. *Women & Health* 2017;57:154-72.
- 8  
9 34. Polo-Kantola P, Aukia L, Karlsson H, et al. Sleep quality during pregnancy: Associations  
10 with depressive and anxiety symptoms. *Acta Obstetrica Et Gynecologica Scandinavica* 2017;96.
- 11  
12 35. Mindell JA, Cook RA, Nikolovski J. Sleep patterns and sleep disturbances across pregnancy.  
13 *Sleep Medicine* 2015;16:483-88.
- 14  
15 36. Bayrampour H, McDonald S, Tough S. Risk factors of transient and persistent anxiety during  
16 pregnancy. *Midwifery* 2015;31:582-89.
- 17  
18 37. Lancaster CA, Gold KJ, Flynn HA, et al. Risk factors for depressive symptoms during  
19 pregnancy: a systematic review. *American journal of obstetrics and gynecology* 2010;202:5-14.
- 20  
21 38. Giesbrecht GF, Poole JC, Letourneau N, et al. The Buffering Effect of Social Support on  
22 Hypothalamic-Pituitary-Adrenal Axis Function During Pregnancy. *Psychosom Med*  
23 2013;75:856-62.
- 24  
25 39. Thompson T, Perez M, Kreuter M, et al. Perceived social support in African American breast  
26 cancer patients: Predictors and effects (vol 192, pg 134, 2017). *Soc Sci Med* 2019;223:117-20.
- 27  
28 40. Grant KA, McMahan C, Austin M-P. Maternal anxiety during the transition to parenthood: A  
29 prospective study. *Journal of Affective Disorders* 2008;108:101-11.
- 30  
31 41. Clark LA, Watson D. Tripartite model of anxiety and depression: psychometric evidence and  
32 taxonomic implications. *Journal of abnormal psychology* 1991;100:316-36.
- 33  
34  
35  
36  
37  
38  
39  
40  
41  
42  
43  
44  
45  
46  
47  
48  
49  
50  
51  
52  
53  
54  
55  
56  
57  
58  
59  
60

STROBE Statement—checklist of items that should be included in reports of observational studies

|                                  | Item No | Recommendation                                                                                                                                                                                                                                                                                                                                                                                                                                                         | page       |
|----------------------------------|---------|------------------------------------------------------------------------------------------------------------------------------------------------------------------------------------------------------------------------------------------------------------------------------------------------------------------------------------------------------------------------------------------------------------------------------------------------------------------------|------------|
| <b>Title and abstract</b>        | 1       | (a) Indicate the study's design with a commonly used term in the title or the abstract                                                                                                                                                                                                                                                                                                                                                                                 | 1          |
|                                  |         | (b) Provide in the abstract an informative and balanced summary of what was done and what was found                                                                                                                                                                                                                                                                                                                                                                    | 1          |
| <b>Introduction</b>              |         |                                                                                                                                                                                                                                                                                                                                                                                                                                                                        | <b>2-3</b> |
| Background/ratio<br>nale         | 2       | Explain the scientific background and rationale for the investigation being reported                                                                                                                                                                                                                                                                                                                                                                                   | 2-3        |
| Objectives                       | 3       | State specific objectives, including any prespecified hypotheses                                                                                                                                                                                                                                                                                                                                                                                                       | 3          |
| <b>Methods</b>                   |         |                                                                                                                                                                                                                                                                                                                                                                                                                                                                        | <b>3-4</b> |
| Study design                     | 4       | Present key elements of study design early in the paper                                                                                                                                                                                                                                                                                                                                                                                                                | 3          |
| Setting                          | 5       | Describe the setting, locations, and relevant dates, including periods of recruitment, exposure, follow-up, and data collection                                                                                                                                                                                                                                                                                                                                        | 3          |
| Participants                     | 6       | (a) <i>Cohort study</i> —Give the eligibility criteria, and the sources and methods of selection of participants. Describe methods of follow-up<br><i>Case-control study</i> —Give the eligibility criteria, and the sources and methods of case ascertainment and control selection. Give the rationale for the choice of cases and controls<br><i>Cross-sectional study</i> —Give the eligibility criteria, and the sources and methods of selection of participants | 3-4        |
|                                  |         | (b) <i>Cohort study</i> —For matched studies, give matching criteria and number of exposed and unexposed<br><i>Case-control study</i> —For matched studies, give matching criteria and the number of controls per case                                                                                                                                                                                                                                                 |            |
| Variables                        | 7       | Clearly define all outcomes, exposures, predictors, potential confounders, and effect modifiers. Give diagnostic criteria, if applicable                                                                                                                                                                                                                                                                                                                               | 4-6        |
| Data sources/<br>measure<br>ment | 8*      | For each variable of interest, give sources of data and details of methods of assessment (measurement). Describe comparability of assessment methods if there is more than one group                                                                                                                                                                                                                                                                                   | 4          |
| Bias                             | 9       | Describe any efforts to address potential sources of bias                                                                                                                                                                                                                                                                                                                                                                                                              | 4          |
| Study size                       | 10      | Explain how the study size was arrived at                                                                                                                                                                                                                                                                                                                                                                                                                              | 4          |
| Quantitative<br>variables        | 11      | Explain how quantitative variables were handled in the analyses. If applicable, describe which groupings were chosen and why                                                                                                                                                                                                                                                                                                                                           | 6          |

|    |                |     |                                                                          |
|----|----------------|-----|--------------------------------------------------------------------------|
| 1  |                |     |                                                                          |
| 2  |                |     |                                                                          |
| 3  | Statistica     | 12  | (a) Describe all statistical methods, including those used to            |
| 4  | 1              |     | control for confounding                                                  |
| 5  |                |     | 6                                                                        |
| 6  | methods        |     | (b) Describe any methods used to examine subgroups and                   |
| 7  |                |     | interactions                                                             |
| 8  |                |     | (c) Explain how missing data were addressed                              |
| 9  |                |     | (d) <i>Cohort study</i> —If applicable, explain how loss to follow-up    |
| 10 |                |     | was addressed                                                            |
| 11 |                |     | 6                                                                        |
| 12 |                |     | <i>Case-control study</i> —If applicable, explain how matching of cases  |
| 13 |                |     | and controls was addressed                                               |
| 14 |                |     | <i>Cross-sectional study</i> —If applicable, describe analytical methods |
| 15 |                |     | taking account of sampling strategy                                      |
| 16 |                |     | (e) Describe any sensitivity analyses                                    |
| 17 |                |     |                                                                          |
| 18 |                |     |                                                                          |
| 19 |                |     |                                                                          |
| 20 |                |     |                                                                          |
| 21 |                |     |                                                                          |
| 22 | <b>Results</b> |     | <b>6-15</b>                                                              |
| 23 | Participants   | 13* | (a) Report numbers of individuals at each stage of study—eg              |
| 24 |                |     | numbers potentially eligible, examined for eligibility, confirmed        |
| 25 |                |     | eligible, included in the study, completing follow-up, and               |
| 26 |                |     | analysed                                                                 |
| 27 |                |     | (b) Give reasons for non-participation at each stage                     |
| 28 |                |     | 4                                                                        |
| 29 |                |     | (c) Consider use of a flow diagram                                       |
| 30 |                |     |                                                                          |
| 31 | Descriptive    | 14* | (a) Give characteristics of study participants (eg demographic,          |
| 32 | data           |     | clinical, social) and information on exposures and potential             |
| 33 |                |     | confounders                                                              |
| 34 |                |     | (b) Indicate number of participants with missing data for each           |
| 35 |                |     | variable of interest                                                     |
| 36 |                |     | (c) <i>Cohort study</i> —Summarise follow-up time (eg, average and       |
| 37 |                |     | total amount)                                                            |
| 38 |                |     |                                                                          |
| 39 |                |     |                                                                          |
| 40 | Outcome data   | 15* | <i>Cohort study</i> —Report numbers of outcome events or summary         |
| 41 |                |     | measures over time                                                       |
| 42 |                |     | <i>Case-control study</i> —Report numbers in each exposure category,     |
| 43 |                |     | or summary measures of exposure                                          |
| 44 |                |     | <i>Cross-sectional study</i> —Report numbers of outcome events or        |
| 45 |                |     | summary measures                                                         |
| 46 |                |     | 7                                                                        |
| 47 |                |     |                                                                          |
| 48 | Main results   | 16  | (a) Give unadjusted estimates and, if applicable, confounder-            |
| 49 |                |     | adjusted estimates and their precision (eg, 95% confidence               |
| 50 |                |     | interval). Make clear which confounders were adjusted for and            |
| 51 |                |     | why they were included                                                   |
| 52 |                |     | (b) Report category boundaries when continuous variables were            |
| 53 |                |     | categorized                                                              |
| 54 |                |     | (c) If relevant, consider translating estimates of relative risk into    |
| 55 |                |     | absolute risk for a meaningful time period                               |
| 56 |                |     |                                                                          |
| 57 | Other analyses | 17  | Report other analyses done—eg analyses of subgroups and                  |
| 58 |                |     | interactions, and sensitivity analyses                                   |
| 59 |                |     |                                                                          |
| 60 |                |     |                                                                          |



|                          |    |                                                                                                                                                                            |              |
|--------------------------|----|----------------------------------------------------------------------------------------------------------------------------------------------------------------------------|--------------|
| <b>Discussion</b>        |    |                                                                                                                                                                            | <b>11-14</b> |
| Key results              | 18 | Summarise key results with reference to study objectives                                                                                                                   | 11-13        |
| Limitations              | 19 | Discuss limitations of the study, taking into account sources of potential bias or imprecision. Discuss both direction and magnitude of any potential bias                 | 14c          |
| Interpretation           | 20 | Give a cautious overall interpretation of results considering objectives, limitations, multiplicity of analyses, results from similar studies, and other relevant evidence | 14           |
| Generalisability         | 21 | Discuss the generalisability (external validity) of the study results                                                                                                      |              |
| <b>Other information</b> |    |                                                                                                                                                                            |              |
| Funding                  | 22 | Give the source of funding and the role of the funders for the present study and, if applicable, for the original study on which the present article is based              | 14           |

# BMJ Open

## Prevalence of depression symptoms and its influencing factors among pregnant women in late pregnancy in urban areas of Hengyang City, Hunan Province, China: a cross-sectional study

|                                 |                                                                                                                                                                                                                                                                                                                                                                                                                                                                                                                                                                                                                                                                                                                                                                     |
|---------------------------------|---------------------------------------------------------------------------------------------------------------------------------------------------------------------------------------------------------------------------------------------------------------------------------------------------------------------------------------------------------------------------------------------------------------------------------------------------------------------------------------------------------------------------------------------------------------------------------------------------------------------------------------------------------------------------------------------------------------------------------------------------------------------|
| Journal:                        | <i>BMJ Open</i>                                                                                                                                                                                                                                                                                                                                                                                                                                                                                                                                                                                                                                                                                                                                                     |
| Manuscript ID                   | bmjopen-2020-038511.R1                                                                                                                                                                                                                                                                                                                                                                                                                                                                                                                                                                                                                                                                                                                                              |
| Article Type:                   | Original research                                                                                                                                                                                                                                                                                                                                                                                                                                                                                                                                                                                                                                                                                                                                                   |
| Date Submitted by the Author:   | 02-Jun-2020                                                                                                                                                                                                                                                                                                                                                                                                                                                                                                                                                                                                                                                                                                                                                         |
| Complete List of Authors:       | Yu, Yunhan; Central South University Xiangya School of Public Health, Department of Social Medicine and Health Management<br>Zhu, Xidi; Central South University Xiangya School of Public Health, Department of Social Medicine and Health Management<br>Xu, Huilan; Central South University Xiangya School of Public Health, Social Medicine and Health Management<br>Hu, Zhao; Central South University Xiangya School of Public Health, Zhou, Wensu; Central South University, Social Medicine and Health Management, Xiangya School of Public Health;<br>Zheng, Baohua; Central South University Xiangya School of Public Health, Department of Social Medicine and Health Management<br>Yin, Shilin; Central South University Xiangya School of Public Health |
| <b>Primary Subject Heading</b>: | Mental health                                                                                                                                                                                                                                                                                                                                                                                                                                                                                                                                                                                                                                                                                                                                                       |
| Secondary Subject Heading:      | Public health                                                                                                                                                                                                                                                                                                                                                                                                                                                                                                                                                                                                                                                                                                                                                       |
| Keywords:                       | MENTAL HEALTH, Depression & mood disorders < PSYCHIATRY, Public health < INFECTIOUS DISEASES, PSYCHIATRY                                                                                                                                                                                                                                                                                                                                                                                                                                                                                                                                                                                                                                                            |
|                                 |                                                                                                                                                                                                                                                                                                                                                                                                                                                                                                                                                                                                                                                                                                                                                                     |

SCHOLARONE™  
Manuscripts



I, the Submitting Author has the right to grant and does grant on behalf of all authors of the Work (as defined in the below author licence), an exclusive licence and/or a non-exclusive licence for contributions from authors who are: i) UK Crown employees; ii) where BMJ has agreed a CC-BY licence shall apply, and/or iii) in accordance with the terms applicable for US Federal Government officers or employees acting as part of their official duties; on a worldwide, perpetual, irrevocable, royalty-free basis to BMJ Publishing Group Ltd ("BMJ") its licensees and where the relevant Journal is co-owned by BMJ to the co-owners of the Journal, to publish the Work in this journal and any other BMJ products and to exploit all rights, as set out in our [licence](#).

The Submitting Author accepts and understands that any supply made under these terms is made by BMJ to the Submitting Author unless you are acting as an employee on behalf of your employer or a postgraduate student of an affiliated institution which is paying any applicable article publishing charge ("APC") for Open Access articles. Where the Submitting Author wishes to make the Work available on an Open Access basis (and intends to pay the relevant APC), the terms of reuse of such Open Access shall be governed by a Creative Commons licence – details of these licences and which [Creative Commons](#) licence will apply to this Work are set out in our licence referred to above.

Other than as permitted in any relevant BMJ Author's Self Archiving Policies, I confirm this Work has not been accepted for publication elsewhere, is not being considered for publication elsewhere and does not duplicate material already published. I confirm all authors consent to publication of this Work and authorise the granting of this licence.

1  
2  
3 1 **Prevalence of depression symptoms and its influencing factors among pregnant women in late**  
4 **pregnancy in urban areas of Hengyang City, Hunan Province, China: a cross-sectional study**

5 2  
6  
7 3 Yun-Han Yu<sup>a, 1</sup>, Xi-Di Zhu<sup>a, 1</sup>, Hui-Lan Xu<sup>a,\*</sup>, Zhao Hu<sup>a</sup>, Wen-Su Zhou<sup>a</sup>, Bao-Hua Zheng<sup>a</sup>, Shi-Lin  
8  
9 4 Yin<sup>a</sup>

10  
11  
12 5 a. Department of Social Medicine and Health Management, Xiangya School of Public Health, Central  
13  
14 6 South University, Changsha, China

15  
16  
17 7 \* Corresponding author. Tel.:+0731-84805459; Fax:+0731-84805459. Email addresses:

18  
19 8 XHL202020@163.com (H.-L. Xu).

20  
21 9 **Word count:** 3606 words.

22  
23 10 **ABSTRACT**

24  
25 11 **Objectives:** To evaluate the prevalence of depressive symptoms and its influencing factors in late  
26  
27 12 pregnancy.

28  
29 13 **Design:** Cross-sectional study.

30  
31 14 **Setting:** Fourteen community in urban areas of Hengyang City.

32  
33 15 **Participants:** The study conducted from July to October 2019, and surveyed 813 women in late  
34  
35 16 pregnancy who lived in urban areas of Hengyang for more than 6 months, signed informed an informed  
36  
37 17 consent, and were and were without cognitive disorders, severe mental illnesses or other serious diseases.

38  
39 18 **Measures:** Perinatal depression symptoms were evaluated using the Patient Health Questionnaire-9  
40  
41 19 (PHA-9), and perinatal anxiety symptoms were evaluated using the Generalized Anxiety Disorder Scale-  
42  
43 20 7 (GAD-7). Sociodemographic variables, obstetric characteristics, lifestyle behaviors, family factors,  
44  
45 21 social support, sleep quality, and self-efficacy were obtained through structured questionnaires.

46  
47 22 **Results:** The prevalence of depression symptoms among pregnant women in late pregnancy was 9.2%  
48  
49 23 (95% confidence interval, CI: 7.2%,11.2%). Protective factor: Age between 25 to 29 years (OR = 0.398;  
50  
51 24 95% CI 0.16,0.991). Risk factors: a normal relationship with her mother-in-law (OR=5.309; 95% CI  
52  
53 25 1.122,4.184), artificial insemination (OR=4.339; 95% CI 1.492,12.623), no exercise during pregnancy  
54  
55 26 (OR=2.666, 95% CI 1.177,6.039), low self-efficacy (OR=4.253; 95% CI 1.518,11.916), low social  
56  
57 27 support (OR=2.371; 95% CI 1.206,4.661), poor sleep quality (OR=2.134; 95% CI 1.131,4.027),  
58  
59  
60

1  
2  
3 1 existence of anxiety symptoms (OR=17.654; 95% CI 8.494,36.689).

4  
5 2 **Conclusion:** The prevalence of depression symptoms is lower than that in developing countries, but due  
6  
7 3 to the large population base of China, the problem should still be taken seriously. To prevent mental  
8  
9 4 disorders of pregnant women, early screening for mental disorders, promotion of healthy lifestyles,  
10  
11 5 mental health care during pregnancy, and improved family and social support should be implemented  
12  
13 6 during pregnancy nursing.

14  
15 7 **Keywords:** Depression symptoms; Late pregnancy; Prevalence; Influencing factors; China

### 18 **Article Summary**

#### 19 **Strengths and limitations of the study**

##### 20 **Strengths:**

21  
22 1. This study investigated the depression symptoms of pregnant women after excluding pregnancy  
23  
24 complications and explored a wide range of influencing factors, including psychological,  
25  
26 physiological and social aspects.

27  
28 2. This study was a larger sample size than other studies in China; the sample was from the  
29  
30 community and avoided hospital bias.

##### 31 **Limitations:**

32  
33 1. The disadvantage of this study is that the cross-sectional design cannot determine the causal  
34  
35 relationship between the influencing factors and depressive symptoms.

36  
37 2. The participants' recall may lead to recall bias.

38  
39  
40  
41  
42  
43 8

### 44 **1. Introduction**

45  
46 10 Pregnant women undergo role, physiological and psychological changes. Physiological problems may  
47  
48 occur during pregnancy, such as constipation, sleepiness, physiological dyspnea, and hormone level  
49  
50 11 fluctuation, while physiological discomfort, hormonal effects and changes in social roles may cause  
51  
52 12 cognitive, behavioral and emotional changes in pregnant women, resulting in mental health problems.  
53  
54 13 These issues are likely to continue to postpartum and can lead to more serious psychological health and  
55  
56 14 fetal adverse outcomes and developmental problems<sup>1,2</sup>. The gestation period includes the first trimester  
57  
58  
59  
60

1 (before the 13th weekend), the second trimester (between the 14th and 17th weekends), and late  
2 pregnancy (28 weeks and beyond). Because of the increase of pregnancy duration in late pregnancy,  
3 pregnant women's sleep time is shortened, and snoring and the number and times of waking up at night  
4 are increased, leading to poor sleep quality and affecting the emotional regulation mechanism of  
5 pregnant women<sup>3</sup>. Studies have shown that women in their third trimester worried more about their  
6 baby's health and delivery and were at increased risk for depression symptoms<sup>4</sup>. Therefore, it is of great  
7 significance to consider antenatal mental health status and to determine its potential influencing factors  
8 by investigating pregnant women in late pregnancy.

9 There has been a wide range of discussion on prenatal depression. Prenatal depression is a mental  
10 disorder during pregnancy characterized by persistent low mood, slow thinking and exercise inhibition.  
11 However, the prevalence rates of these conditions were different in different countries based on their  
12 measurements and culture background variations. A systematic review performed by retrieving  
13 observational studies at three different time periods found that the incidence of depression symptoms in  
14 late pregnancy was 12%<sup>5</sup>. However, a meta-analysis of prenatal depression in Ethiopia showed that the  
15 combined prevalence of prenatal depression was 21.28% (95% CI;15.96-27.78), and the highest  
16 prevalence of depressive symptoms was 32.10% in late pregnancy, with 19.13% in the first trimester  
17 and 18.86% in the second trimester<sup>6</sup>.

18 From personal and social perspectives, associated factors for depression in pregnant women mainly  
19 included four domains: (1) sociodemographic factors; (2) pregnancy characteristics; (3) personality  
20 characteristics and (4) psychosocial factors. For sociodemographic factors such as age, for example, a  
21 study on depression symptoms among pregnant women in the middle and third trimesters showed that  
22 the younger they are, the higher the positive rate of depression symptoms they have<sup>7</sup>. Pregnancy  
23 characteristics such as planned pregnancy<sup>8</sup> and history of abortion<sup>9</sup> and personality traits such as low  
24 self-efficacy were related to prenatal depression<sup>10</sup>. Psychosocial factors such as socioeconomic status,  
25 social support and life events were associated with mental health during pregnancy<sup>11</sup>.

26 Existing research on depression has been more focused on postpartum; reports of depression  
27 symptoms in late pregnancy have been less common, and most of them have explored the situation from

1  
2  
3 1 a single dimension using minor specimens. Therefore, the purpose of the current study was to describe  
4  
5 2 the prevalence of depression symptoms in late pregnancy and to comprehensively analyze its influencing  
6  
7 3 factors. The results of this study may provide scientific basis for the evaluation of mental health status  
8  
9 4 in a prepregnancy examination program and mental health care service to prevent the symptoms of  
10  
11 5 depression in pregnant women.  
12  
13  
14 6

## 15 7 **2. Methods**

### 16 8 *2.1. Design and participants*

17  
18  
19  
20 9 This was a cross-sectional survey of pregnant women in late pregnancy in urban areas of Hengyang  
21  
22 10 City, Hunan Province, China, conducted from July to October 2019. The sampling method was a  
23  
24 11 multistage cluster random sampling method. There are 5 administrative districts in urban Hengyang. In  
25  
26 12 the first stage, one street was randomly selected in each district. In the second stage, because the  
27  
28 13 minimum number of communities on a street is 3, 14 communities were randomly selected according  
29  
30 14 to a ratio of 1:3, including 4 communities from Zhengxiang street, 3 communities from Qingshan street,  
31  
32 15 3 communities from Baishazhou street, 2 communities from Guangdong road street and 2 communities  
33  
34 16 from Zhurong street.  
35

36  
37 17 Inclusion criteria: pregnant women in late pregnancy who had lived in urban areas of Hengyang for  
38  
39 18 more than 6 months and had signed informed consent (gestational week: 28 weeks and beyond).  
40  
41 19 Exclusion criteria: Women with cognitive disorders, severe mental illnesses or other serious diseases  
42  
43 20 and those who could not fill out the questionnaire by themselves.  
44

45 21 The sample size was estimated using the sample size calculation formula for cross-sectional studies.  
46  
47 22 According to previous studies, the prevalence of depression symptoms among pregnant women in late  
48  
49 23 pregnancy was 32.1%<sup>[6]</sup>. In this study, with admissible error  $d=0.1p$ ,  $p=0.05$ ,  $\alpha=0.05$ , the minimum  
50  
51 24 theoretical sample size for the study was calculated to be approximately 812 people. In fact, 813  
52  
53 25 pregnant women completed the survey by filling in a paper or electronic WeChat questionnaire after  
54  
55 26 informed consent was obtained, and the results were further analyzed.  
56  
57  
58  
59  
60

## 1 2.2 Measurement

### 2 2.2.1 Demographic characteristics

3 The self-report questionnaire was used to obtain demographic information of pregnant women,  
4 including age, ethnicity, marital status, her and her husband's education, occupation, per-capita monthly  
5 income, and medical expenses payment methods.

### 6 2.2.2 Pregnancy characteristics and lifestyle

7 Pregnancy characteristics included parity (0, 1,  $\geq 2$ ), methods of pregnancy (Artificial  
8 insemination/Spontaneous pregnancy), whether planned pregnancy, pregnancy complications  
9 (including gestational hypertension, gestational diabetes, intrahepatic cholestasis, cervical disease),  
10 number of abortions (0, 1,  $\geq 2$ ), and whether regular antenatal examinations were performed.

11 Lifestyle included pre-pregnancy body mass index (Pre-BMI), her and her husband's smoking habits,  
12 her and her husband's drinking habits, and exercise. Prepregnancy BMI was based on the pregnant  
13 woman's self-reported height and weight before and after pregnancy using China's classification of thin  
14 (BMI < 18.5 kg/m<sup>2</sup>), normal weight (BMI of 18.5-23.9 kg/m<sup>2</sup>), and overweight (BMI > 23.9 kg/m<sup>2</sup>).  
15 Smoking was defined as an average of one cigarette a day for the past year. Drinking was defined as  
16 drinking alcohol on average once a week. Exercise was defined as walking, yoga, or other forms during  
17 the past week, Yes or No.

### 18 2.2.3 Outcome measurements

19 Depression symptoms in late pregnancy were assessed using the Patient Health Questionnaire (PHQ-  
20 9). This questionnaire has been widely used in clinical and observation studies with good reliability and  
21 validity. There are 9 items in this questionnaire, and the score of each item is set to 0-3, with a total  
22 score of 27. The higher the score, the more obvious the depression symptoms are, with a total score  $\geq 10$   
23 considered to be depression symptoms<sup>12,13</sup>, with a Cronbach's  $\alpha$  coefficient of 0.773.

### 24 2.2.4 Family factors

25 Family factors include family function, the relationship with the mother-in-law and experience of  
26 domestic abuse. Family function was assessed using the Family Adaptation Partnership Growth and  
27 Resolve Index (APGAR). The APGAR scale contains five items and five dimensions, respectively



1 reflecting the adaptability, cooperation, maturity, affection and affinity of family functions. Each item  
2 was scored using a 3-point Likert scale, with a total score of 0-10, with a score of 7-10 indicating good  
3 family function, 4-6 indicating moderate family function disorder, and 0-3 indicating severe family  
4 function disorder<sup>14</sup>. APGAR is widely used and has good reliability and validity in pregnant women in  
5 China<sup>15</sup>, with a Cronbach's  $\alpha$  coefficient of 0.876 in this study. The Abuse Assessment Screen (AAS)  
6 was used to assess domestic violence during pregnancy. Eight items were used to assess exposure to  
7 domestic violence in the past year and during pregnancy, including physical, emotional and sexual  
8 violence. The respondents answered 'yes' to items 3/4/5/6/7; the total number of times of abuse was  
9 more than three times, subjective pain, and the three conditions were considered to have experienced  
10 domestic violence<sup>16</sup>. Research shows that the AAS questionnaire has good reliability and validity in  
11 pregnant women, with a Cronbach's  $\alpha$  coefficient of 0.685 in this study.

#### 12 2.2.5 Other relevance factors

13 The Social Support Rating Scale (SSRS)<sup>17</sup> was used in this study to evaluate the status of social  
14 support for pregnant women, as introduced by Xiao, and included objective support, subjective support  
15 and the availability of support. A higher score means higher social support. A total score less than 39 in  
16 this study was considered as low social support. The scale has good reliability and validity, with a  
17 Cronbach's  $\alpha$  coefficient of 0.705 in this study.

18 This study used the Pittsburgh sleep quality index (PSQI) to evaluate maternal sleep quality. The total  
19 score of PSQI is between 0 and 21 points, and the higher the score, the worse the sleep quality. PSQI  
20 scores  $\leq 7$  were rated as "good sleep quality", while PSQI scores  $> 7$  were rated as "poor sleep quality".  
21 Studies have shown that the PSQI scale has good reliability and validity in evaluating sleep quality<sup>18</sup>,  
22 and the Chinese version of the PSQI questionnaire has been widely accepted as a sleep quality  
23 assessment method in mainland China, with a Cronbach's  $\alpha$  coefficient of 0.789 in this study.

24 The Self-efficacy Scale (GSES) was used to evaluate pregnant women's self-efficacy. The GSES was  
25 developed by German health psychology and clinical experts Ralf and Schwarzer and was translated  
26 into Chinese by JianXin Zhang<sup>19</sup>. This scale is a single-dimension scale with 10 items. Each item has 4  
27 options: completely incorrect, moderately correct, mostly correct and completely correct, marked as 1,

1  
2  
3 1 2, 3 and 4, with the total score ranging from 10 to 40. The total score is divided by the total score of 10  
4  
5 2 items into low level (0-2), medium level (2.1-3), and high level (3.1-4). The higher the score, the better  
6  
7 3 the self-efficacy is. The Cronbach '  $\alpha$  coefficient of this scale was 0.898 in this study.  
8

9 4 The Generalized Anxiety Disorder scale-7 (GAD-7) was used in this study to evaluate the anxiety of  
10  
11 5 women in late pregnancy. This table was developed by Spitzer et al. 2006 and consisted of 7 items for  
12  
13 6 screening generalized anxiety disorder<sup>20</sup>. Participants were asked if they had experienced seven  
14  
15 7 symptoms in the past two weeks, with each item being scored on a scale of four, "0= not at all", "1=  
16  
17 8 days", "2= more than half days", and "3= almost every day", with a score ranging from 0 to 21. Studies  
18  
19 9 have shown that using a cut-off score of 10 is a good way to distinguish anxiety from non-anxiety<sup>21</sup>. In  
20  
21 10 our study, the Cronbach's  $\alpha$  coefficient was 0.773.  
22  
23  
24  
25

### 26 12 *2.3 Ethical considerations*

27  
28 13 All respondents gave written informed consent before entering the study and volunteered for the  
29  
30 14 survey. The study was approved by the Ethics Committee of the Xiangya School of public Health,  
31  
32 15 Central South University (XYGW-2019-056), prior to the field investigation.  
33  
34  
35  
36

### 37 17 *2.4 Statistical analysis*

38  
39 18 SPSS version 25.0 was used to collate and analyze the data. Continuous variables were converted into  
40  
41 19 categorical variables by referring to the literature and combining research purposes, and all categorical  
42  
43 20 variables are described as counts and percentages. Univariate analysis used the Chi-square test or  
44  
45 21 Fisher's test to analyze the relationship between sociodemographic characteristics, pregnancy  
46  
47 22 characteristics, lifestyle, family factors, social support, sleep quality, self-efficacy with depressive  
48  
49 23 symptoms and compared the characteristics of between the depression symptoms and nondepression  
50  
51 24 symptoms groups. A multivariate binary logistic regression with odds ratios (ORs) was used to analyze  
52  
53 25 the influencing factors of prenatal depression symptoms. Depression symptoms were taken as dependent  
54  
55 26 variables, and factors with statistical significance ( $P < 0.05$ ) in the univariate analysis were taken as  
56  
57 27 independent variables, including age ( $\leq 24$ , 25-29, 30-34,  $\geq 35$ ), pre-BMI (thin, normal, overweight),  
58  
59  
60

1  
2  
3 1 exercise (yes or no), relationship with mother-in-law (bad, general, good), family function (serious  
4  
5 2 difficulty, moderate difficulty, well), social support (high or low), sleep quality (good or poor), and self-  
6  
7 3 efficacy (low, medium, high). All statistical tests were 2-sided.  
8  
9 4

## 11 5 *2.5 Patient and public involvement*

13 6 Patients and the public were not involved in the design of this study.  
14  
15 7

## 18 8 **3. Results**

### 20 9 *3.1 Participants*

22 10 Fourteen communities had 819 women in late pregnancy who were registered in community health  
23  
24 11 service centers, but 3 women in late pregnancy did not conform to the inclusion criteria (n=816), and  
25  
26 12 three pregnant women did not complete the questionnaire and refused to participate in the survey  
27  
28 13 (n=813), for a refusal rate of 0.36%. The sampling process is shown in Figure 1.  
29  
30  
31 14  
32  
33 15  
34  
35 16  
36  
37  
38 17

### 37 17 *3.2 Sample characteristics*

40 18 All participants were aged 17-54 years (mean=29). Most of them were ethnic Han (98.2%). Most  
41  
42 19 were in the state of marriage (95.4%). More than half had college/university and above as their highest  
43  
44 20 education (58.1%). Most of the pregnant women were working during pregnancy (73.7%). More than  
45  
46 21 half of their husbands had college/university education and above (59.9%). Most of the husbands were  
47  
48 22 working (98.3%). The per-capita monthly income was between 3001-7999 yuan for 70% of households.  
49  
50 23 The majority of pregnant women (72.8%) were covered by medical insurance, as shown in Table 1. A  
51  
52 24 total of 41.6% were pregnant for the first time. The vast majority (95.9%) of pregnant women conceived  
53  
54 25 naturally. More than half (59%) were in a planned pregnancy. More than half (64.0%) of pregnant  
55  
56 26 women had no history of miscarriage. Most of the pregnant women were without pregnancy  
57  
58 27 complications (89.5%). The vast majority of pregnant women received regular prenatal examinations  
59  
60

(91.4%). The prepregnancy BMI was normal for 67.1% of pregnant women. A total of 91.4% of participants exercised during pregnancy, and the results are shown in Table 2. More than half (64.3%) of the pregnant women had a good relationship with their mother-in-law, and 60.4% of the pregnant women had good family function. Most of the pregnant women (90.5%) did not experience violence during pregnancy. A total of 75.4% of the pregnant women had good sleep quality. More than half (54.9%) of the pregnant women had a high level of social support, and 60.9% of their self-efficacy was in the medium level; the results are shown in Table 3. In our study, the prevalence rates of depression symptoms and anxiety symptoms were 9.2% and 7.9%, respectively. The results are shown in Table 1 and Table 3.

Table 1

Demographic information of pregnant women and distribution of depression symptoms (N=813).

| Characteristic          | Total      | Depression symptoms |          | <i>p</i> Value     |
|-------------------------|------------|---------------------|----------|--------------------|
|                         | n(%)       | NO n(%)             | YES n(%) |                    |
| N                       | 813(100.0) | 738(90.8)           | 75(9.2)  |                    |
| Age                     |            |                     |          | <b>0.017</b>       |
| ≤24                     | 115(14.1)  | 100(87.0)           | 15(13.0) |                    |
| 25-29                   | 366(45.1)  | 343(93.7)           | 23(6.3)  |                    |
| 30-34                   | 232(28.5)  | 202(87.1)           | 30(12.9) |                    |
| ≥35                     | 100(12.3)  | 93(93.0)            | 7(7.0)   |                    |
| Ethnicity               |            |                     |          | 1.000 <sup>a</sup> |
| Minority                | 15(1.8)    | 14(93.3)            | 1(6.7%)  |                    |
| Han ethnicity           | 798(98.2)  | 724(90.7)           | 74(9.3)  |                    |
| Marital status          |            |                     |          | 0.527 <sup>a</sup> |
| Single/divorced/widowed | 37(4.6 )   | 32(86.5)            | 5(13.5)  |                    |
| Married                 | 776(95.4)  | 706(91.0)           | 70(9.0)  |                    |

|    |                                           |           |           |                    |
|----|-------------------------------------------|-----------|-----------|--------------------|
| 1  |                                           |           |           |                    |
| 2  |                                           |           |           |                    |
| 3  | Education level                           |           |           | 0.577              |
| 4  |                                           |           |           |                    |
| 5  | Junior middle school or below             | 158(19.4) | 140(88.6) | 18(11.4)           |
| 6  |                                           |           |           |                    |
| 7  | High school or technical secondary school | 183(22.5) | 167(91.3) | 16(8.7)            |
| 8  |                                           |           |           |                    |
| 9  | College or above                          | 472(58.1) | 431(91.3) | 41(8.7)            |
| 10 |                                           |           |           |                    |
| 11 | Working status                            |           |           | 0.838              |
| 12 |                                           |           |           |                    |
| 13 | Unemployed                                | 214(26.3) | 195(91.1) | 19(8.9)            |
| 14 |                                           |           |           |                    |
| 15 | Employed                                  | 599(73.7) | 543(90.7) | 56(9.3)            |
| 16 |                                           |           |           |                    |
| 17 |                                           |           |           |                    |
| 18 | Education level (Husband)                 |           |           | 0.704              |
| 19 |                                           |           |           |                    |
| 20 | Junior middle school or below             | 122(15.0) | 111(91.0) | 11(9.0)            |
| 21 |                                           |           |           |                    |
| 22 | High school or technical secondary school | 204(25.1) | 188(92.2) | 16(7.8)            |
| 23 |                                           |           |           |                    |
| 24 | College or above                          | 487(59.9) | 439(90.1) | 48(9.9)            |
| 25 |                                           |           |           |                    |
| 26 | Working status (Husband)                  |           |           |                    |
| 27 |                                           |           |           |                    |
| 28 | Unemployed                                | 14(1.7)   | 14(100.0) | 0(0.0)             |
| 29 |                                           |           |           |                    |
| 30 | Employed                                  | 799(98.3) | 724(90.6) | 75(9.4)            |
| 31 |                                           |           |           |                    |
| 32 |                                           |           |           |                    |
| 33 | Per-capita monthly income, ¥              |           |           | 0.603              |
| 34 |                                           |           |           |                    |
| 35 | ≤3000                                     | 73(9.0)   | 64(87.7)  | 9(12.3)            |
| 36 |                                           |           |           |                    |
| 37 |                                           |           |           |                    |
| 38 |                                           |           |           |                    |
| 39 | 3001-7999                                 | 572(70.3) | 520(90.9) | 52(9.1)            |
| 40 |                                           |           |           |                    |
| 41 | ≥8000                                     | 168(20.7) | 154(91.7) | 14(8.3)            |
| 42 |                                           |           |           |                    |
| 43 | Medical expenses payment methods          |           |           | 0.588 <sup>a</sup> |
| 44 |                                           |           |           |                    |
| 45 | Free                                      | 29(3.6)   | 28(96.6)  | 1(3.4)             |
| 46 |                                           |           |           |                    |
| 47 | Out-of-pocket                             | 192(23.6) | 176(91.7) | 16(8.3)            |
| 48 |                                           |           |           |                    |
| 49 | Medical insurance                         | 592(72.8) | 534(90.2) | 58(9.8)            |
| 50 |                                           |           |           |                    |

1

2 Table 2

3 Pregnancy characteristics and lifestyle of pregnant women (N=813).

| Characteristic | Total | Depression symptoms | <i>p</i> Value |
|----------------|-------|---------------------|----------------|
|----------------|-------|---------------------|----------------|

|                               | n(%)      | NO n(%)   | YES n(%) |                          |
|-------------------------------|-----------|-----------|----------|--------------------------|
| Parity                        |           |           |          | 0.201                    |
| 0                             | 338(41.6) | 314(92.9) | 24(7.1)  |                          |
| 1                             | 413(50.8) | 368(89.1) | 45(10.9) |                          |
| ≥2                            | 62(7.6)   | 56(90.3)  | 6(9.7)   |                          |
| Method of pregnancy           |           |           |          | <b>0.034<sup>a</sup></b> |
| Artificial insemination       | 33(4.1)   | 26(78.8)  | 7(21.2)  |                          |
| Spontaneous pregnancy         | 780(95.9) | 712(91.3) | 68(8.7)  |                          |
| Planned pregnancy             |           |           |          | 0.291                    |
| Yes                           | 480(59.0) | 440(91.7) | 40(8.3)  |                          |
| No                            | 333(41.0) | 298(89.5) | 35(10.5) |                          |
| Number of abortions           |           |           |          | 0.112                    |
| 0                             | 520(64.0) | 480(92.3) | 40(7.7)  |                          |
| 1                             | 114(14.0) | 99(86.8)  | 15(13.2) |                          |
| ≥2                            | 179(22.0) | 159(88.8) | 20(11.2) |                          |
| Pregnancy complications       |           |           |          | 0.646                    |
| Yes                           | 85(10.5)  | 76(89.4)  | 9(10.6)  |                          |
| No                            | 728(89.5) | 662(90.9) | 66(9.1)  |                          |
| Regular antenatal examination |           |           |          | 0.126                    |
| Yes                           | 743(91.4) | 678(91.3) | 65(8.7)  |                          |
| No                            | 70(8.6)   | 60(85.7)  | 10(14.3) |                          |
| Prepregnancy BMI              |           |           |          | <b>0.002</b>             |
| Thin                          | 165(20.4) | 158(95.8) | 7(4.2)   |                          |
| Normal                        | 542(67.1) | 479(88.4) | 63(11.6) |                          |
| Overweight/obesity            | 101(12.5) | 97(96.0)  | 4(4.0)   |                          |
| Exercise                      |           |           |          | <b>0.001</b>             |
| Yes                           | 743(91.4) | 682(91.8) | 61(8.2)  |                          |

1  
2  
3 No 70(8.6) 56(50) 14(20.0)  
4  
5  
6  
7  
8  
9  
10  
11  
12  
13  
14  
15  
16  
17  
18  
19  
20  
21  
22  
23  
24  
25  
26  
27  
28  
29  
30  
31  
32  
33  
34  
35  
36  
37  
38  
39  
40  
41  
42  
43  
44  
45  
46  
47  
48  
49  
50  
51  
52  
53  
54  
55  
56  
57  
58  
59  
60

1  
2 Table 3  
3 Family factors and other relevance factors of pregnant women (N=813).

| Characteristic                  | Total      | Depression symptoms |          | <i>p</i> Value    |
|---------------------------------|------------|---------------------|----------|-------------------|
|                                 | n(%)       | NO n(%)             | YES n(%) |                   |
| Relationship with mother-in-law |            |                     |          | <b>&lt; 0.001</b> |
| Bad                             | 27(3.3)    | 22(81.5)            | 5(18.5)  |                   |
| General                         | 263(32.3 ) | 226(85.9)           | 37(14.1) |                   |
| Good                            | 523(64.3)  | 490(93.7)           | 33(6.3)  |                   |
| Family function                 |            |                     |          | <b>&lt; 0.001</b> |
| Serious difficulty              | 66(8.1)    | 49(74.2)            | 17(25.8) |                   |
| Moderate difficulty             | 256(31.5)  | 234(91.4)           | 22(8.6)  |                   |
| Well                            | 491(60.4)  | 455(92.7)           | 36(7.3)  |                   |
| Domestic violence               |            |                     |          | 0.107             |
| Yes                             | 77(9.5)    | 66(85.7)            | 11(14.3) |                   |
| No                              | 736(90.5)  | 672(91.3)           | 64(8.7)  |                   |
| Sleep quality                   |            |                     |          | <b>&lt; 0.001</b> |
| Bad                             | 200(24.6)  | 163(81.5)           | 37(18.5) |                   |
| Good                            | 613(75.4)  | 575(93.8)           | 38(6.2)  |                   |
| Self-efficacy                   |            |                     |          | <b>&lt; 0.001</b> |
| Low level                       | 184(22.6)  | 151(82.1)           | 33(17.9) |                   |
| Medium level                    | 495(60.9)  | 461(93.1)           | 34(6.9 ) |                   |

|                  |           |           |                   |
|------------------|-----------|-----------|-------------------|
| High level       | 134(16.5) | 126(94.0) | 8(6.0)            |
| Social support   |           |           | <b>&lt; 0.001</b> |
| Low              | 367(45.1) | 313(85.3) | 54(14.7)          |
| High             | 446(54.9) | 425(95.3) | 21(4.7)           |
| Anxiety symptoms |           |           | <b>&lt; 0.001</b> |
| Yes              | 64(7.9)   | 30(46.9)  | 34(53.1)          |
| No               | 749(92.1) | 708(94.5) | 41(5.5)           |

1

2 <sup>a</sup> Continuity Correction.3 *3.3 Influencing factors of depressive symptoms in late pregnancy.*

4 The results of Chi-square test showed that age, prepregnancy BMI, relationship with mother-in-law, mode of conception, exercise during pregnancy, sleep quality, self-efficacy, social support and anxiety symptoms were significantly correlated with depression symptoms in late pregnancy (all  $P < 0.05$ ). The results are shown in Tables 1, 2, and 3.

8 Multivariate binary logistic regression results show that in women, the odds of prenatal depression symptoms were reduced by age between 25 to 29 years (OR = 0.398, 95% CI 0.16,0.991), and the odds of prenatal depression symptoms were increased by artificial insemination during pregnancy (OR = 4.339, 95% CI 1.492,12.623), no exercise during pregnancy (OR=2.666, 95% CI 1.177,6.039), poor relationships with their mother-in-law (OR=5.309, 95% CI 1.122,4.184), poor sleep quality (OR=2.134, 95% CI 1.131,4.027), low self-efficacy (OR=4.253, 95% CI 1.518,11.916), low social support (OR=2.371, 95% CI 1.206,4.661), and anxiety symptoms (OR=17.654, 95% CI 8.494,36.689). The results are shown in Table 4.

16

17

18 Table 4.

19 Factors associated with depression symptoms in late pregnancy(N=813).



| Variables                       | $\beta$       | Wald         | <i>p</i> Value | OR (95%CI)                 |
|---------------------------------|---------------|--------------|----------------|----------------------------|
| Age                             |               |              |                |                            |
| ≤24                             |               |              |                | Reference                  |
| 25-29                           | <b>-0.921</b> | <b>3.919</b> | <b>0.048</b>   | <b>0.398(0.160–0.991)</b>  |
| 30-34                           | 0.544         | 1.343        | 0.247          | 1.723(0.686–4.326)         |
| ≥35                             | -0.053        | 0.007        | 0.932          | 0.949(0.284–3.171)         |
| Method of conception            |               |              |                |                            |
| Artificial insemination         | <b>1.468</b>  | <b>7.257</b> | <b>0.007</b>   | <b>4.339(1.492–12.623)</b> |
| Spontaneous pregnancy           |               |              |                | Reference                  |
| Exercise                        |               |              |                |                            |
| No                              | <b>0.980</b>  | <b>5.522</b> | <b>0.019</b>   | <b>2.666 (1.177–6.039)</b> |
| Yes                             |               |              |                | Reference                  |
| Relationship with mother-in-law |               |              |                |                            |
| Poor                            | -0.890        | 1.334        | 0.248          | 0.411(0.091–1.859)         |
| Moderate                        | <b>0.773</b>  | <b>5.309</b> | <b>0.021</b>   | <b>2.167(1.122–4.184)</b>  |
| Good                            |               |              |                | Reference                  |
| Sleep quality                   |               |              |                |                            |
| Bad                             | <b>0.758</b>  | <b>5.476</b> | <b>0.019</b>   | <b>2.134(1.131–4.027)</b>  |
| Good                            |               |              |                | Reference                  |
| Self-efficacy                   |               |              |                |                            |
| Low level                       | <b>1.448</b>  | <b>7.582</b> | <b>0.006</b>   | <b>4.253(1.518–11.916)</b> |
| Medium level                    | 0.408         | 0.674        | 0.412          | 1.504(0.568–3.985)         |
| High level                      |               |              |                | Reference                  |
| Social support                  |               |              |                |                            |
| Low                             | <b>0.863</b>  | <b>6.271</b> | <b>0.012</b>   | <b>2.371(1.206–4.661)</b>  |
| High                            |               |              |                | Reference                  |

Anxiety

No

Reference

Yes

2.871 59.166 0.000 17.654(8.494–36.689)

## 4. Discussion

### 4.1 The prevalence of depression symptoms

The prevalence of depression symptoms in late pregnancy was 9.2% (95% CI: 7.2%,11.2%), indicating lower rates of depression symptoms than those in other developing countries, such as the prevalence rates of depression symptoms reported in Pakistan (18%)<sup>22</sup> and in Thailand (46.8%)<sup>23</sup>. The main reasons for this result are cultural and demographic differences between countries, as well as the adaptability of different scales<sup>24</sup>. Under the influence of China's "Saving face culture", people generally have the idea that one should not wash one's dirty linen in public. They are often reluctant to show their weaknesses and bad emotions to outsiders to maintain their own good image and maintain the family's sense of honor and reputation. Thus, pregnant women tend to hide their negative emotions so as not to be seen as weak or discriminated against, which leads researchers to underestimate the positive rates of depression and anxiety symptoms in this group, making our results different from those of other countries.

### 4.2 The influencing factors of depression symptoms in late pregnancy.

#### 4.2.1 Sociodemographic factors

Pregnant women between the ages of 25 and 29 had a lower risk of depression than a younger group, in contrast to a meta-analysis in Ethiopia that reported that pregnant women between 20 and 29 were more likely to have symptoms of prenatal depression<sup>6</sup>, probably because of differences in cultural and educational levels between the two countries. Most pregnant women in this age group already had work experience; thus, they were less worried about finding a job after becoming pregnant. In China, the legal age for marriage and childbirth is 20; thus, they were more likely to experience having children and had

1  
2  
3 1 more knowledge and skills about pregnancy and childbirth<sup>25</sup>. In addition, women aged 25 to 29 have  
4  
5 2 higher levels of psychological and physical maturity and are better able to withstand stressful life events  
6  
7 3 and prevent depression symptoms.  
8  
9 4

#### 11 5 *4.2.2 Pregnancy characteristics and lifestyle factors*

13 6 Artificial insemination was a risk factor for depression symptoms and has a significant impact on the  
14  
15 7 mental health of pregnant women. The main reason for artificial insemination was infertility, and women  
16  
17 8 were more likely to feel the stress of infertility<sup>26</sup>. Because of China's outdated culture of "having a boy  
18  
19 9 to carry on the family line", artificial insemination, as a manifestation of fertility pressure, continued to  
20  
21 10 affect the mental health of pregnant women<sup>27</sup>. After successful artificial insemination, the state of  
22  
23 11 pregnancy became the focus of attention of oneself and the family, with worries about loss of the  
24  
25 12 pregnancy, which made pregnant women who were artificially inseminated have more worry and  
26  
27 13 excessive tension than woman with natural pregnancy<sup>28</sup>.

30 14 Women who did not exercise during pregnancy might be at greater risk for depression, and exercise  
31  
32 15 during pregnancy could be effective in preventing depression symptoms. Exercise had positive cognitive  
33  
34 16 and emotional benefits while reducing pain and negative effects<sup>29</sup>.  
35  
36  
37  
38

#### 39 18 *4.2.3 Family factors*

41 19 As a special culture of developing countries, the relationship culture between mother-in-law and  
42  
43 20 daughter-in-law has been discussed in other articles, and the results were similar to ours<sup>30,31</sup>. In our  
44  
45 21 study, pregnant women with moderate relationships with their mother-in-law were more than twice as  
46  
47 22 likely to have symptoms of prenatal depression as women with good relationships. In Chinese culture,  
48  
49 23 people do not easily report or admit that they have relationship friction or poor relationships with others.  
50  
51 24 Most people were used to using moderate relationships as a substitute, which led to greater risks for  
52  
53 25 pregnant women who have moderate relationships with their mothers-in-law. Due to the one-child  
54  
55 26 policy implemented in China in the 1980s, the relationship between parents and children was an  
56  
57 27 important part of the family relationship, and coupled with the influence of family culture and  
58  
59  
60

1  
2  
3 1 intergenerational transfer, it was common for women to live with their in-laws after marriage in less-  
4  
5 2 developed areas<sup>32</sup>. Due to the differences in age, culture, education and living habits, the two were prone  
6  
7 3 to conflict since there was no blood ties and because they lived together for a long time. The friction  
8  
9 4 between mother-in-law and daughter-in-law, coupled with the pregnant woman's concern about the  
10  
11 5 conflict, was likely to continue to affect the pregnant woman's mood and produce depression  
12  
13 6 symptoms<sup>31,33</sup>.

#### 17 7 18 8 *4.2.4 Other factors*

19  
20 9 Perinatal depression symptoms were associated with low self-efficacy in pregnant women, which was  
21  
22 10 related to the mediating effect of self-efficacy on social support, pregnancy stress and depression  
23  
24 11 symptoms<sup>34</sup>. Pregnant women with high levels of self-efficacy could actively face stressful events in  
25  
26 12 life, which was more advantageous for enhancing self-efficacy and thus effectively regulating mood and  
27  
28 13 the prevention of depression symptoms.

29  
30 14 Consistent with other findings, poor sleep quality was associated with depression symptoms in late  
31  
32 15 pregnancy<sup>35</sup>. Due to night urine, fetal movement, leg cramps and other symptoms, the number and time  
33  
34 16 pregnant women awakened during the night would increase, and the sleep time shortened, resulting in  
35  
36 17 poor sleep quality; thus, depression symptoms were related to sleep disorders in late pregnancy<sup>36</sup>.

37  
38 18 Lack of social support was a risk factor for depression symptoms; pregnant women could direct  
39  
40 19 the effects on depression of pregnant women<sup>3,37</sup>. As an important social resource for pregnant women,  
41  
42 20 social support function was a social determinant of mental health. Positive social support made people  
43  
44 21 feel concerned, loved and valued, which could improve the quality of life of pregnant women and  
45  
46 22 promote their mental health<sup>38,39</sup>.

47  
48 23 Consistent with the results of previous studies, pregnant women with anxiety during pregnancy  
49  
50 24 were more likely to suffer from depression symptoms<sup>11,40</sup>. Depression and anxiety symptoms have  
51  
52 25 similarities; therefore, they are often found to coexist<sup>41</sup>. In addition, different emotional problems would  
53  
54 26 affect each other, increasing the risk of other emotions<sup>11</sup>.

## 57 27 **5. Limitation**

1  
2  
3 1 The limitations of this study were that cross-sectional data were used to determine the causal  
4  
5 2 relationship between risk factors and depression, and there were options in the questionnaire that needed  
6  
7 3 to be filled out by participants recalling the situations of the last week, month or year, meaning that there  
8  
9 4 was recall bias. However, this questionnaire selected a measurement tool with certain reliability and  
10  
11 5 validity to minimize this problem. Additionally, the data were from women in late pregnancy in an urban  
12  
13 6 area of Hengyang city; thus, the results could not be extended to rural areas. However, due to the  
14  
15 7 urbanization process and intergenerational transfer process in China, this study had greater predictive  
16  
17 8 significance. In addition, after screening pregnant women for depression symptoms, no further diagnosis  
18  
19 9 and intervention was performed.

## 20 21 22 10 **6. Conclusion**

23  
24 11 Our study reported that the prevalence rate of depression symptoms was 9.2% in pregnant women in  
25  
26 12 Hengyang city. The influencing factors were age, relationship with the mother-in-law, mode of  
27  
28 13 pregnancy, exercise during pregnancy, sleep quality, self-efficacy, social support, and symptoms of  
29  
30 14 anxiety symptoms. These findings suggested that the medical institutions should add mental health  
31  
32 15 screening tools in pregnancy examinations to realize early discovery, early diagnosis and early treatment.  
33  
34 16 When implementing maternal health care in medical institutions and community health service  
35  
36 17 institutions, we should pay attention to the psychological status of pregnant women and provide them  
37  
38 18 with targeted maternal health nursing.

## 39 40 41 42 43 20 **Acknowledgments**

44  
45 21 The author would like to thank all members of the research team for their hard work in the process of  
46  
47 22 research design and data collection and for the academic guidance and assistance of team members in  
48  
49 23 the process of paper writing.

## 50 51 52 53 25 **Funding**

54  
55 26 None

1  
2  
3 **1 Disclaimer**  
4

5 2 The views expressed in this article belong to the authors and are not to the official position of any  
6  
7 3 other institution or funder.  
8

9  
10 4  
11 **5 Ethical Statement**  
12

13  
14 6 The study has been approved by the Ethics Committee of the Xiangya School of Public Health,  
15  
16 7 Central South University, on 15 July 2019 (XYGW-2019-056).  
17

18 8  
19  
20 **9 Conflict of interest**  
21

22 10 None  
23  
24 11

25  
26 **12 Author Contributions**  
27

28 13 Yunhan yu, Xidi zhu, and Zhao hu: conceptualization, methodology, software; Yunhan Yu: data  
29  
30 14 curation, writing, original draft preparation, reviewing; Yunhan yu, Xidi zhu, Zhao hu, Wensu zhou,  
31  
32 15 Baohua zheng, and Shilin yin: visualization and investigation; Huilan xu: supervision.  
33  
34 16

35  
36  
37 **17 Data availability statement**  
38

39 18 No additional data available  
40  
41 19

42  
43 **20 Figure legends**  
44

45 21 Figure 1 Sample flow chart  
46  
47  
48  
49  
50  
51  
52  
53  
54  
55  
56  
57  
58  
59  
60

1  
2  
3 1  
4  
5 2**References**

- 3 1. Walder DJ, Laplante DP, Sousa-Pires A, et al. Prenatal maternal stress predicts autism traits in 6  
4 year-old children: Project Ice Storm. *Psychiatry Research* 2014;219:353-60.
- 5 2. Staneva A, Bogossian F, Pritchard M, et al. The effects of maternal depression, anxiety, and  
6 perceived stress during pregnancy on preterm birth: A systematic review. *Women & Birth*  
7 2015;28:179-93.
- 8 3. Bayrampour H, McDonald S, Tough S. Risk factors of transient and persistent anxiety during  
9 pregnancy. *Midwifery* 2015;31:582-89.
- 10 4. Bisetegn TA, Mihretie G, Muche T. Prevalence and Predictors of Depression among Pregnant Women  
11 in Debretabor Town, Northwest Ethiopia. *PloS one* 2016;11:e0161108.
- 12 5. Bennett HA, Einarson A, Taddio A, et al. Prevalence of Depression During Pregnancy: Systematic  
13 Review. *Obstetrics & Gynecology* 2004;103:698-709.
- 14 6. Ayano G, Tesfaw G, Shumet S. Prevalence and determinants of antenatal depression in Ethiopia: A  
15 systematic review and meta-analysis. *PloS one* 2019;14:e0211764.
- 16 7. Bowen A, Bowen R, Maslany G, et al. Anxiety in a socially high-risk sample of pregnant women in  
17 Canada. *Canadian Journal of Psychiatry* 2008;53:435-40.
- 18 8. Mohammad KI, Gamble JA, Creedy DK. Prevalence and factors associated with the development of  
19 antenatal and postnatal depression among Jordanian women. 2011;27:e238-e45.
- 20 9. Scheidt CE, Kunze M, Wangler J, et al. [Psychological consequences of perinatal loss in subsequent  
21 pregnancies--a comparative study]. *Psychother Psychosom Med Psychol* 2008;58:475-78.
- 22 10. Kossakowska, Karolina. Incidence and determinants of postpartum depression among healthy  
23 pregnant women and high-risk pregnant women. *Post?py Psychiatrii i Neurologii* 2016;25:1-21.
- 24 11. Tang X, Lu Z, Hu D, et al. Influencing factors for prenatal Stress, anxiety and depression in early  
25 pregnancy among women in Chongqing, China. *J Affect Disord* 2019;253:292-302.
- 26 12. Kroenke K, Spitzer RL, Williams JBW. The PHQ-9 : Validity of a Brief Depression Severity Measure.  
27 *Journal of General Internal Medicine* 2001;16:606-13.
- 28 13. Chin W-Y, Wan EYF, Dowrick C, et al. Tree analysis modeling of the associations between PHQ-9  
29 depressive symptoms and doctor diagnosis of depression in primary care. *Psychological*  
30 *Medicine* 2019;49:449-57.
- 31 14. Smilkstein G, Ashworth C, Dan M. Validity and Reliability of the Family APGAR as a Test of Family  
32 Function. *J Fam Pract* 1982;15:303-11.
- 33 15. Liu Y, Xiu-ling D, Li Z. Influence of social support and family function on the approach of delivery. *Chinese*  
34 *modern clinical medicine* 2012;38:358-61.
- 35 16. Reichenheim, E M. Comparison between the abuse assessment screen and the revised conflict  
36 tactics scales for measuring physical violence during pregnancy. *Journal of Epidemiology &*  
37 *Community Health* 2004;58:523-27.
- 38 17. Xiao SY. The social support rating scale. *Chin Ment Health J* 1999;12:127-31.

18. Liu, Tang M. Reliability and validity of the Pittsburgh sleep quality index *Chinese Journal of Psychiatry* 1996;29:103-07.
19. Zhang JX, Schwarzer R. Measuring optimistic self-beliefs: A Chinese adaptation of the General Self-Efficacy Scale. *Psychologia An International Journal of Psychology in the Orient* 1995;38:174-81.
20. Spitzer RL, Kroenke K, Williams JBW, et al. A Brief Measure for Assessing Generalized Anxiety Disorder: The GAD-7. *Archives of Internal Medicine* 2006;166:1092-97.
21. Schalet BD, Cook KF, Choi SW, et al. Establishing a common metric for self-reported anxiety: Linking the MASQ, PANAS, and GAD-7 to PROMIS Anxiety. *J Anxiety Disord* 2014;28:88-96.
22. Karmaliani R, Asad N, Bann CM, et al. Prevalence of anxiety, depression and associated factors among pregnant women of Hyderabad, Pakistan. *The International journal of social psychiatry* 2009;55:414-24.
23. Nitikorn P, Leif E, C. LP. Antenatal depressive symptoms during late pregnancy among women in a North-eastern province of Thailand: prevalence and associated factors. *Asian Journal of Psychiatry* 2018;36:102-07.
24. Halbreich U, Karkun S. Cross-cultural and social diversity of prevalence of postpartum depression and depressive symptoms. *Journal of Affective Disorders* 2016;91:97-111.
25. Qiao Y-X, Wang J, Li J, et al. The prevalence and related risk factors of anxiety and depression symptoms among Chinese pregnant women in Shanghai. *Australian & New Zealand Journal Of Obstetrics & Gynaecology* 2009;49:185-90.
26. Hosaka T, Matsubayashi H, Sugiyama Y, et al. Effect of psychiatric group intervention on natural-killer cell activity and pregnancy rate. *Gen Hosp Psych* 2002;24:353-56.
27. H m, Ren J, Gao P. A related study of depression and anxiety in female patients with infertility. *Chinese psychiatry* 2017;30:438-40.
28. Ren LJ, Zhang Y, Xu Q. Analysis of anxiety and depression in pregnant women at different stages of pregnancy and its influencing factors. *Chinese people's military surgeon* 2018;61:797-801.
29. Lindwall M, Josefsson T, Archer T. Effects of Physical Exercise on Depressive Symptoms and Biomarkers in Depression. *Cns Neurol Disord Drug Targets* 2014;13: 1640-53.
30. Fisher J, Tran T, La Bt, et al. Common perinatal mental disorders in northern Viet Nam: community prevalence and health care use. *Bulletin of the World Health Organization* 2010;88:737-45.
31. Wan EY, Moyer CA, Harlow SD, et al. Postpartum depression and traditional postpartum care in China: Role of Zuoyuezi. *Int J Gynecol Obstet* 2009;104:209-13.
32. Jiang QB, Liu YX. Low fertility and concurrent birth control policy in China. *Hist Fam* 2016;21:551-77.
33. Fisher J, de Mello MC, Patel V, et al. Prevalence and determinants of common perinatal mental disorders in women in low- and lower-middle-income countries: a systematic review. *Bulletin Of the World Health Organization* 2012;90:139-49.
34. Razurel C, Kaiser B, Antonietti JP, et al. Relationship between perceived perinatal stress and depressive symptoms, anxiety, and parental self-efficacy in primiparous mothers and the role



- 1  
2  
3  
4 1 of social support. *Women & Health* 2017;57:154-72.
- 5 2 35. Polo-Kantola P, Aukia L, Karlsson H, et al. Sleep quality during pregnancy: Associations with  
6 3 depressive and anxiety symptoms. *Acta Obstetrica Et Gynecologica Scandinavica*  
7 4 2017;96:198-206.
- 8 5 36. Mindell JA, Cook RA, Nikolovski J. Sleep patterns and sleep disturbances across pregnancy. *Sleep*  
9 6 *Medicine* 2015;16:483-88.
- 10 7 37. Lancaster CA, Gold KJ, Flynn HA, et al. Risk factors for depressive symptoms during pregnancy: a  
11 8 systematic review. *American journal of obstetrics and gynecology* 2010;202:5-14.
- 12 9 38. Giesbrecht GF, Poole JC, Letourneau N, et al. The Buffering Effect of Social Support on  
13 10 Hypothalamic-Pituitary-Adrenal Axis Function During Pregnancy. *Psychosom Med*  
14 11 2013;75:856-62.
- 15 12 39. Thompson T, Perez M, Kreuter M, et al. Perceived social support in African American breast cancer  
16 13 patients: Predictors and effects (vol 192, pg 134, 2017). *Soc Sci Med* 2019;223:117-20.
- 17 14 40. Grant KA, McMahon C, Austin M-P. Maternal anxiety during the transition to parenthood: A  
18 15 prospective study. *Journal of Affective Disorders* 2008;108:101-11.
- 19 16 41. Clark LA, Watson D. Tripartite model of anxiety and depression: psychometric evidence and  
20 17 taxonomic implications. *Journal of abnormal psychology* 1991;100:316-36.
- 21  
22  
23  
24  
25  
26  
27  
28  
29  
30  
31  
32  
33  
34  
35  
36  
37  
38  
39  
40  
41  
42  
43  
44  
45  
46  
47  
48  
49  
50  
51  
52  
53  
54  
55  
56  
57  
58  
59  
60

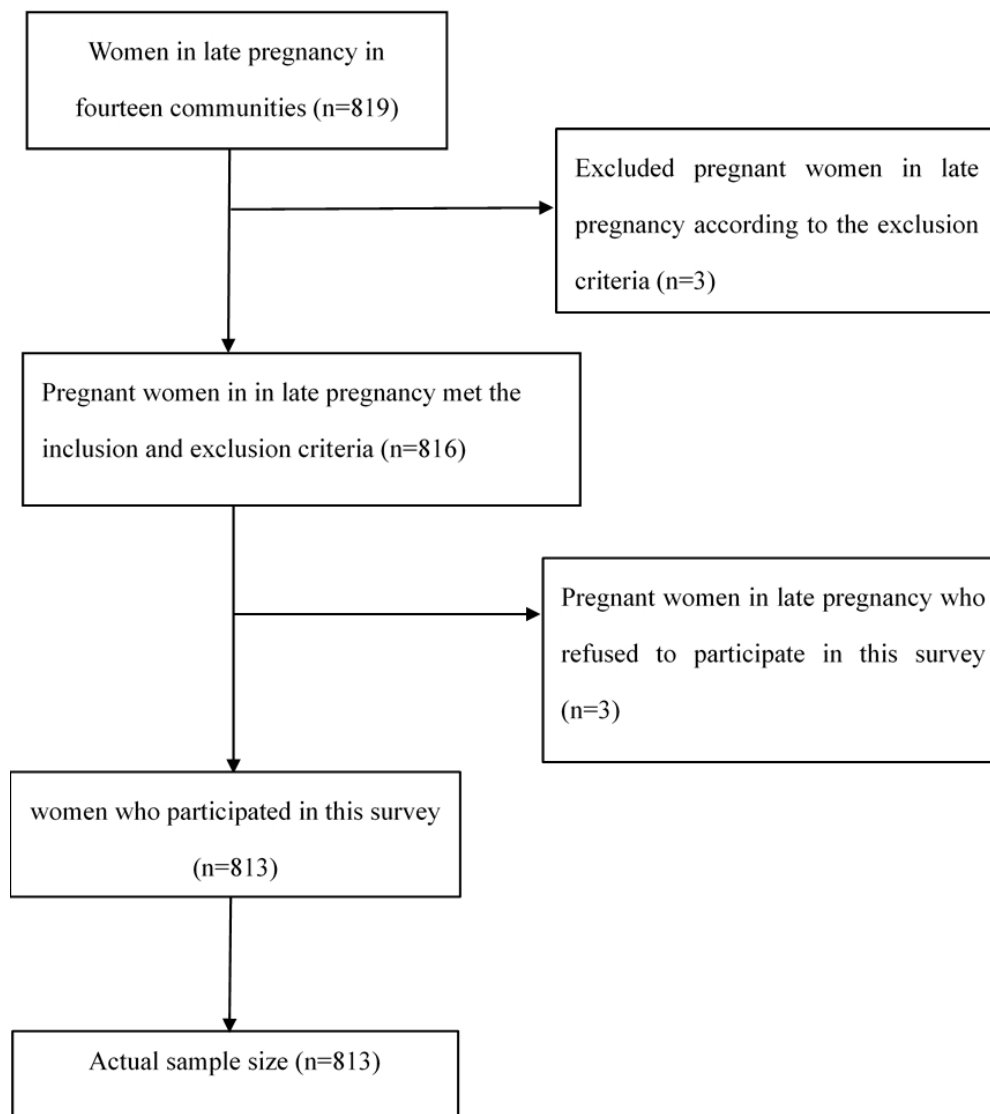

229x257mm (96 x 96 DPI)

STROBE Statement—checklist of items that should be included in reports of observational studies

|                           | Item No | Recommendation                                                                                                                                                                                                                                                                                                                                                                                                                                                         | page       |
|---------------------------|---------|------------------------------------------------------------------------------------------------------------------------------------------------------------------------------------------------------------------------------------------------------------------------------------------------------------------------------------------------------------------------------------------------------------------------------------------------------------------------|------------|
| <b>Title and abstract</b> | 1       | (a) Indicate the study's design with a commonly used term in the title or the abstract                                                                                                                                                                                                                                                                                                                                                                                 | 1          |
|                           |         | (b) Provide in the abstract an informative and balanced summary of what was done and what was found                                                                                                                                                                                                                                                                                                                                                                    | 1-2        |
| <b>Introduction</b>       |         |                                                                                                                                                                                                                                                                                                                                                                                                                                                                        | <b>2-4</b> |
| Background/ratio/nale     | 2       | Explain the scientific background and rationale for the investigation being reported                                                                                                                                                                                                                                                                                                                                                                                   | 2-3        |
| Objectives                | 3       | State specific objectives, including any prespecified hypotheses                                                                                                                                                                                                                                                                                                                                                                                                       | 3-4        |
| <b>Methods</b>            |         |                                                                                                                                                                                                                                                                                                                                                                                                                                                                        | <b>4-7</b> |
| Study design              | 4       | Present key elements of study design early in the paper                                                                                                                                                                                                                                                                                                                                                                                                                | 4          |
| Setting                   | 5       | Describe the setting, locations, and relevant dates, including periods of recruitment, exposure, follow-up, and data collection                                                                                                                                                                                                                                                                                                                                        | 4          |
| Participants              | 6       | (a) <i>Cohort study</i> —Give the eligibility criteria, and the sources and methods of selection of participants. Describe methods of follow-up<br><i>Case-control study</i> —Give the eligibility criteria, and the sources and methods of case ascertainment and control selection. Give the rationale for the choice of cases and controls<br><i>Cross-sectional study</i> —Give the eligibility criteria, and the sources and methods of selection of participants | 4          |
|                           |         | (b) <i>Cohort study</i> —For matched studies, give matching criteria and number of exposed and unexposed<br><i>Case-control study</i> —For matched studies, give matching criteria and the number of controls per case                                                                                                                                                                                                                                                 |            |
| Variables                 | 7       | Clearly define all outcomes, exposures, predictors, potential confounders, and effect modifiers. Give diagnostic criteria, if applicable                                                                                                                                                                                                                                                                                                                               | 4-7        |
| Data sources/measurement  | 8*      | For each variable of interest, give sources of data and details of methods of assessment (measurement). Describe comparability of assessment methods if there is more than one group                                                                                                                                                                                                                                                                                   | 4-7        |
| Bias                      | 9       | Describe any efforts to address potential sources of bias                                                                                                                                                                                                                                                                                                                                                                                                              | 4          |
| Study size                | 10      | Explain how the study size was arrived at                                                                                                                                                                                                                                                                                                                                                                                                                              | 4          |
| Quantitative variables    | 11      | Explain how quantitative variables were handled in the analyses. If applicable, describe which groupings were chosen and why                                                                                                                                                                                                                                                                                                                                           | 7          |

|    |                |     |                                                                          |
|----|----------------|-----|--------------------------------------------------------------------------|
| 1  |                |     |                                                                          |
| 2  |                |     |                                                                          |
| 3  | Statistica     | 12  | (a) Describe all statistical methods, including those used to            |
| 4  | 1              |     | control for confounding                                                  |
| 5  |                |     | 7                                                                        |
| 6  | methods        |     | (b) Describe any methods used to examine subgroups and                   |
| 7  |                |     | interactions                                                             |
| 8  |                |     | (c) Explain how missing data were addressed                              |
| 9  |                |     | (d) <i>Cohort study</i> —If applicable, explain how loss to follow-up    |
| 10 |                |     | was addressed                                                            |
| 11 |                |     | 7                                                                        |
| 12 |                |     | <i>Case-control study</i> —If applicable, explain how matching of cases  |
| 13 |                |     | and controls was addressed                                               |
| 14 |                |     | <i>Cross-sectional study</i> —If applicable, describe analytical methods |
| 15 |                |     | taking account of sampling strategy                                      |
| 16 |                |     | (e) Describe any sensitivity analyses                                    |
| 17 |                |     |                                                                          |
| 18 |                |     |                                                                          |
| 19 |                |     |                                                                          |
| 20 |                |     |                                                                          |
| 21 |                |     |                                                                          |
| 22 | <b>Results</b> |     | <b>8-14</b>                                                              |
| 23 | Participants   | 13* | (a) Report numbers of individuals at each stage of study—eg              |
| 24 |                |     | numbers potentially eligible, examined for eligibility, confirmed        |
| 25 |                |     | eligible, included in the study, completing follow-up, and               |
| 26 |                |     | analysed                                                                 |
| 27 |                |     | (b) Give reasons for non-participation at each stage                     |
| 28 |                |     | 8                                                                        |
| 29 |                |     | (c) Consider use of a flow diagram                                       |
| 30 |                |     | 8                                                                        |
| 31 | Descriptive    | 14* | (a) Give characteristics of study participants (eg demographic,          |
| 32 | data           |     | clinical, social) and information on exposures and potential             |
| 33 |                |     | confounders                                                              |
| 34 |                |     | (b) Indicate number of participants with missing data for each           |
| 35 |                |     | variable of interest                                                     |
| 36 |                |     | (c) <i>Cohort study</i> —Summarise follow-up time (eg, average and       |
| 37 |                |     | total amount)                                                            |
| 38 |                |     | 8-12                                                                     |
| 39 |                |     |                                                                          |
| 40 | Outcome data   | 15* | <i>Cohort study</i> —Report numbers of outcome events or summary         |
| 41 |                |     | measures over time                                                       |
| 42 |                |     | <i>Case-control study</i> —Report numbers in each exposure category,     |
| 43 |                |     | or summary measures of exposure                                          |
| 44 |                |     | <i>Cross-sectional study</i> —Report numbers of outcome events or        |
| 45 |                |     | summary measures                                                         |
| 46 |                |     | 9-13                                                                     |
| 47 |                |     |                                                                          |
| 48 | Main results   | 16  | (a) Give unadjusted estimates and, if applicable, confounder-            |
| 49 |                |     | adjusted estimates and their precision (eg, 95% confidence               |
| 50 |                |     | interval). Make clear which confounders were adjusted for and            |
| 51 |                |     | why they were included                                                   |
| 52 |                |     | (b) Report category boundaries when continuous variables were            |
| 53 |                |     | categorized                                                              |
| 54 |                |     | (c) If relevant, consider translating estimates of relative risk into    |
| 55 |                |     | absolute risk for a meaningful time period                               |
| 56 |                |     | 12-14                                                                    |
| 57 |                |     |                                                                          |
| 58 | Other analyses | 17  | Report other analyses done—eg analyses of subgroups and                  |
| 59 |                |     | interactions, and sensitivity analyses                                   |
| 60 |                |     |                                                                          |

|                          |    |                                                                                                                                                                            |  |              |
|--------------------------|----|----------------------------------------------------------------------------------------------------------------------------------------------------------------------------|--|--------------|
| <b>Discussion</b>        |    |                                                                                                                                                                            |  | <b>14-17</b> |
| Key results              | 18 | Summarise key results with reference to study objectives                                                                                                                   |  | 15-16        |
| Limitations              | 19 | Discuss limitations of the study, taking into account sources of potential bias or imprecision. Discuss both direction and magnitude of any potential bias                 |  | 17           |
| Interpretation           | 20 | Give a cautious overall interpretation of results considering objectives, limitations, multiplicity of analyses, results from similar studies, and other relevant evidence |  | 15-17        |
| Generalisability         | 21 | Discuss the generalisability (external validity) of the study results                                                                                                      |  | 17           |
| <b>Other information</b> |    |                                                                                                                                                                            |  |              |
| Funding                  | 22 | Give the source of funding and the role of the funders for the present study and, if applicable, for the original study on which the present article is based              |  | 18           |
